# Supplementary material
Source: publisher figshare collection journal article supplement (https://acs.figshare.com/ndownloader/files/5063740)
Supplement: Supplementary file 1 [file 5063740]

  
data_complex2_m 
  
_audit_creation_method            SHELXL-97 
_chemical_name_systematic 
; 
 ? 
; 
_chemical_name_common             ? 
_chemical_melting_point           ? 
_chemical_formula_moiety          ? 
_chemical_formula_sum 
 'C92 H62 Cl6 Cu6 N18 S6' 
_chemical_formula_weight          2205.90 
  
loop_ 
 _atom_type_symbol 
 _atom_type_description 
 _atom_type_scat_dispersion_real 
 _atom_type_scat_dispersion_imag 
 _atom_type_scat_source 
 'C'  'C'   0.0181   0.0091 
 'International Tables Vol C Tables 4.2.6.8 and 6.1.1.4' 
 'H'  'H'   0.0000   0.0000 
 'International Tables Vol C Tables 4.2.6.8 and 6.1.1.4' 
 'N'  'N'   0.0311   0.0180 
 'International Tables Vol C Tables 4.2.6.8 and 6.1.1.4' 
 'S'  'S'   0.3331   0.5567 
 'International Tables Vol C Tables 4.2.6.8 and 6.1.1.4' 
 'Cl'  'Cl'   0.3639   0.7018 
 'International Tables Vol C Tables 4.2.6.8 and 6.1.1.4' 
 'Cu'  'Cu'  -1.9646   0.5888 
 'International Tables Vol C Tables 4.2.6.8 and 6.1.1.4' 
  
_symmetry_cell_setting            Triclinic 
_symmetry_space_group_name_H-M    P-1 
  
loop_ 
 _symmetry_equiv_pos_as_xyz 
 'x, y, z' 
 '-x, -y, -z' 
  
_cell_length_a                    12.8145(3) 
_cell_length_b                    14.1021(4) 
_cell_length_c                    15.8709(4) 
_cell_angle_alpha                 115.896(2) 
_cell_angle_beta                  104.918(2) 
_cell_angle_gamma                 95.854(2) 
_cell_volume                      2416.06(11) 
_cell_formula_units_Z             1 
_cell_measurement_temperature     100(2) 
_cell_measurement_reflns_used     ? 
_cell_measurement_theta_min       ? 
_cell_measurement_theta_max       ? 
  
_exptl_crystal_description        prisma 
_exptl_crystal_colour             orange 
_exptl_crystal_size_max           0.12 
_exptl_crystal_size_mid           0.04 
_exptl_crystal_size_min           0.02 
_exptl_crystal_density_meas       0 
_exptl_crystal_density_diffrn     1.516 
_exptl_crystal_density_method     'not measured' 
_exptl_crystal_F_000              1112 
_exptl_absorpt_coefficient_mu     4.615 
_exptl_absorpt_correction_type    multi-scan 
_exptl_absorpt_correction_T_min   0.801 
_exptl_absorpt_correction_T_max   0.912 
_exptl_absorpt_process_details    ? 
  
_exptl_special_details 
; 
 ? 
; 
  
_diffrn_ambient_temperature       100(2) 
_diffrn_radiation_wavelength      1.54178 
_diffrn_radiation_type            CuK\a 
_diffrn_radiation_source          'fine-focus sealed tube' 
_diffrn_radiation_monochromator   graphite 
_diffrn_measurement_device_type   'CCD area detector' 
_diffrn_measurement_method        'phi and omega scans' 
_diffrn_detector_area_resol_mean  ? 
_diffrn_standards_number          ? 
_diffrn_standards_interval_count  ? 
_diffrn_standards_interval_time   ? 
_diffrn_standards_decay_%         ? 
_diffrn_reflns_number             17549 
_diffrn_reflns_av_R_equivalents   0.0475 
_diffrn_reflns_av_sigmaI/netI     0.0674 
_diffrn_reflns_limit_h_min        -15 
_diffrn_reflns_limit_h_max        15 
_diffrn_reflns_limit_k_min        -15 
_diffrn_reflns_limit_k_max        16 
_diffrn_reflns_limit_l_min        -18 
_diffrn_reflns_limit_l_max        18 
_diffrn_reflns_theta_min          3.29 
_diffrn_reflns_theta_max          66.99 
_reflns_number_total              7971 
_reflns_number_gt                 5630 
_reflns_threshold_expression      >2sigma(I) 
  
_computing_data_collection        'Bruker SMART' 
_computing_cell_refinement        'Bruker SMART' 
_computing_data_reduction         'Bruker SAINT' 
_computing_structure_solution     'SHELXS-97 (Sheldrick, 1990)' 
_computing_structure_refinement   'SHELXL-97 (Sheldrick, 1997)' 
_computing_molecular_graphics     'Bruker SHELXTL' 
_computing_publication_material   'Bruker SHELXTL' 
  
_refine_special_details 
; 
 Refinement of F^2^ against ALL reflections.  The weighted R-factor wR and 
 goodness of fit S are based on F^2^, conventional R-factors R are based 
 on F, with F set to zero for negative F^2^. The threshold expression of 
 F^2^ > 2sigma(F^2^) is used only for calculating R-factors(gt) etc. and is 
 not relevant to the choice of reflections for refinement.  R-factors based 
 on F^2^ are statistically about twice as large as those based on F, and R- 
 factors based on ALL data will be even larger. 
; 
  
_refine_ls_structure_factor_coef  Fsqd 
_refine_ls_matrix_type            full 
_refine_ls_weighting_scheme       calc 
_refine_ls_weighting_details 
 'calc w=1/[\s^2^(Fo^2^)+(0.0638P)^2^+0.0000P] where P=(Fo^2^+2Fc^2^)/3' 
_atom_sites_solution_primary      direct 
_atom_sites_solution_secondary    difmap 
_atom_sites_solution_hydrogens    geom 
_refine_ls_hydrogen_treatment     mixed 
_refine_ls_extinction_method      none 
_refine_ls_extinction_coef        ? 
_refine_ls_number_reflns          7971 
_refine_ls_number_parameters      581 
_refine_ls_number_restraints      0 
_refine_ls_R_factor_all           0.0668 
_refine_ls_R_factor_gt            0.0464 
_refine_ls_wR_factor_ref          0.1166 
_refine_ls_wR_factor_gt           0.1080 
_refine_ls_goodness_of_fit_ref    0.935 
_refine_ls_restrained_S_all       0.935 
_refine_ls_shift/su_max           0.001 
_refine_ls_shift/su_mean          0.000 
  
loop_ 
 _atom_site_label 
 _atom_site_type_symbol 
 _atom_site_fract_x 
 _atom_site_fract_y 
 _atom_site_fract_z 
 _atom_site_U_iso_or_equiv 
 _atom_site_adp_type 
 _atom_site_occupancy 
 _atom_site_symmetry_multiplicity 
 _atom_site_calc_flag 
 _atom_site_refinement_flags 
 _atom_site_disorder_assembly 
 _atom_site_disorder_group 
Cu1 Cu 0.84361(5) -0.02704(5) 0.38676(4) 0.02469(16) Uani 1 1 d . . . 
Cu2 Cu 1.05863(5) -0.00909(5) 0.37329(4) 0.02552(16) Uani 1 1 d . . . 
Cu3 Cu 1.00814(5) 0.17028(5) 0.56458(4) 0.02552(16) Uani 1 1 d . . . 
S1 S 0.84830(8) -0.20119(9) 0.30579(7) 0.0227(2) Uani 1 1 d . . . 
S2 S 1.04469(8) 0.16390(9) 0.43127(7) 0.0244(2) Uani 1 1 d . . . 
S3 S 0.78618(8) 0.00787(9) 0.51920(7) 0.0244(2) Uani 1 1 d . . . 
C1 C 0.9069(3) -0.2119(4) 0.2140(3) 0.0251(9) Uani 1 1 d . . . 
C2 C 0.9643(3) -0.2092(4) 0.0675(3) 0.0278(10) Uani 1 1 d . . . 
C3 C 0.9747(4) -0.1885(4) -0.0151(3) 0.0311(10) Uani 1 1 d . . . 
C4 C 1.0692(4) -0.1180(4) -0.0011(3) 0.0354(11) Uani 1 1 d . . . 
H4 H 1.1307 -0.0879 0.0590 0.042 Uiso 1 1 calc R . . 
C5 C 1.0739(5) -0.0913(5) -0.0750(4) 0.0456(13) Uani 1 1 d . . . 
H5 H 1.1390 -0.0446 -0.0665 0.055 Uiso 1 1 calc R . . 
C6 C 0.9813(5) -0.1342(5) -0.1620(4) 0.0501(15) Uani 1 1 d . . . 
H6 H 0.9832 -0.1144 -0.2117 0.060 Uiso 1 1 calc R . . 
C7 C 0.8889(4) -0.2036(5) -0.1763(4) 0.0430(13) Uani 1 1 d . . . 
H7 H 0.8269 -0.2329 -0.2360 0.052 Uiso 1 1 calc R . . 
C8 C 0.8854(4) -0.2320(4) -0.1026(3) 0.0366(11) Uani 1 1 d . . . 
H8 H 0.8212 -0.2814 -0.1128 0.044 Uiso 1 1 calc R . . 
C9 C 0.9066(3) -0.3086(4) 0.0548(3) 0.0259(9) Uani 1 1 d . . . 
C10 C 0.8857(4) -0.4182(4) -0.0300(3) 0.0288(10) Uani 1 1 d . . . 
C11 C 0.9560(4) -0.4419(4) -0.0860(3) 0.0307(10) Uani 1 1 d . . . 
H11 H 1.0139 -0.3854 -0.0746 0.037 Uiso 1 1 calc R . . 
C12 C 0.9419(4) -0.5478(4) -0.1586(3) 0.0325(10) Uani 1 1 d . . . 
H12 H 0.9898 -0.5637 -0.1971 0.039 Uiso 1 1 calc R . . 
C13 C 0.8586(4) -0.6298(4) -0.1748(3) 0.0341(11) Uani 1 1 d . . . 
H13 H 0.8506 -0.7027 -0.2228 0.041 Uiso 1 1 calc R . . 
C14 C 0.7860(4) -0.6062(4) -0.1211(3) 0.0345(11) Uani 1 1 d . . . 
H14 H 0.7267 -0.6625 -0.1342 0.041 Uiso 1 1 calc R . . 
C15 C 0.7996(4) -0.5013(4) -0.0489(3) 0.0329(11) Uani 1 1 d . . . 
H15 H 0.7502 -0.4857 -0.0118 0.040 Uiso 1 1 calc R . . 
C16 C 0.9116(3) 0.1616(4) 0.3628(3) 0.0249(9) Uani 1 1 d . . . 
C17 C 0.7084(3) 0.1564(4) 0.2615(3) 0.0286(10) Uani 1 1 d . . . 
C18 C 0.5908(4) 0.1480(4) 0.2104(3) 0.0325(11) Uani 1 1 d . . . 
C19 C 0.5217(4) 0.0479(5) 0.1364(4) 0.0400(12) Uani 1 1 d . . . 
H19 H 0.5516 -0.0140 0.1139 0.048 Uiso 1 1 calc R . . 
C20 C 0.4086(4) 0.0377(5) 0.0949(4) 0.0406(12) Uani 1 1 d . . . 
H20 H 0.3617 -0.0312 0.0441 0.049 Uiso 1 1 calc R . . 
C21 C 0.3649(4) 0.1259(5) 0.1268(4) 0.0459(14) Uani 1 1 d . . . 
H21 H 0.2875 0.1179 0.0980 0.055 Uiso 1 1 calc R . . 
C22 C 0.4317(4) 0.2269(5) 0.2005(4) 0.0422(13) Uani 1 1 d . . . 
H22 H 0.4004 0.2878 0.2231 0.051 Uiso 1 1 calc R . . 
C23 C 0.5461(4) 0.2387(4) 0.2416(4) 0.0368(11) Uani 1 1 d . . . 
H23 H 0.5931 0.3083 0.2907 0.044 Uiso 1 1 calc R . . 
C24 C 0.8024(3) 0.2388(4) 0.2860(3) 0.0260(9) Uani 1 1 d . . . 
C25 C 0.7970(3) 0.3246(4) 0.2560(3) 0.0281(10) Uani 1 1 d . . . 
C26 C 0.8536(4) 0.4319(4) 0.3252(3) 0.0319(10) Uani 1 1 d . . . 
H26 H 0.8934 0.4496 0.3916 0.038 Uiso 1 1 calc R . . 
C27 C 0.8528(4) 0.5128(4) 0.2988(4) 0.0357(11) Uani 1 1 d . . . 
H27 H 0.8905 0.5860 0.3469 0.043 Uiso 1 1 calc R . . 
C28 C 0.7961(4) 0.4863(4) 0.2009(4) 0.0350(11) Uani 1 1 d . . . 
H28 H 0.7966 0.5416 0.1820 0.042 Uiso 1 1 calc R . . 
C29 C 0.7394(4) 0.3809(4) 0.1312(4) 0.0367(11) Uani 1 1 d . . . 
H29 H 0.7013 0.3636 0.0645 0.044 Uiso 1 1 calc R . . 
C30 C 0.7378(4) 0.2996(4) 0.1583(3) 0.0345(11) Uani 1 1 d . . . 
H30 H 0.6967 0.2272 0.1107 0.041 Uiso 1 1 calc R . . 
C31 C 0.7784(3) 0.1433(4) 0.5606(3) 0.0233(9) Uani 1 1 d . . . 
C32 C 0.6777(3) 0.2722(4) 0.5958(3) 0.0259(9) Uani 1 1 d . . . 
C33 C 0.5880(4) 0.3111(4) 0.6340(3) 0.0294(10) Uani 1 1 d . . . 
C34 C 0.5996(4) 0.4211(4) 0.6961(3) 0.0305(10) Uani 1 1 d . . . 
H34 H 0.6637 0.4736 0.7108 0.037 Uiso 1 1 calc R . . 
C35 C 0.5180(5) 0.4533(5) 0.7360(4) 0.0450(13) Uani 1 1 d . . . 
H35 H 0.5271 0.5281 0.7800 0.054 Uiso 1 1 calc R . . 
C36 C 0.4239(5) 0.3793(5) 0.7132(4) 0.0503(14) Uani 1 1 d . . . 
H36 H 0.3673 0.4027 0.7401 0.060 Uiso 1 1 calc R . . 
C37 C 0.4115(4) 0.2707(5) 0.6513(4) 0.0491(14) Uani 1 1 d . . . 
H37 H 0.3455 0.2193 0.6345 0.059 Uiso 1 1 calc R . . 
C38 C 0.4940(4) 0.2361(4) 0.6133(4) 0.0356(11) Uani 1 1 d . . . 
H38 H 0.4863 0.1607 0.5730 0.043 Uiso 1 1 calc R . . 
C39 C 0.7568(3) 0.3349(4) 0.5786(3) 0.0238(9) Uani 1 1 d . . . 
C40 C 0.7421(3) 0.4293(4) 0.5620(3) 0.0249(9) Uani 1 1 d . . . 
C41 C 0.8331(4) 0.5149(4) 0.5983(3) 0.0307(10) Uani 1 1 d . . . 
H41 H 0.9026 0.5170 0.6397 0.037 Uiso 1 1 calc R . . 
C42 C 0.8229(4) 0.5978(4) 0.5743(4) 0.0372(11) Uani 1 1 d . . . 
H42 H 0.8861 0.6556 0.5979 0.045 Uiso 1 1 calc R . . 
C43 C 0.7215(4) 0.5967(4) 0.5164(4) 0.0374(11) Uani 1 1 d . . . 
H43 H 0.7148 0.6539 0.5004 0.045 Uiso 1 1 calc R . . 
C44 C 0.6305(4) 0.5131(4) 0.4820(4) 0.0397(12) Uani 1 1 d . . . 
H44 H 0.5604 0.5128 0.4428 0.048 Uiso 1 1 calc R . . 
C45 C 0.6402(4) 0.4287(4) 0.5041(3) 0.0316(10) Uani 1 1 d . . . 
H45 H 0.5771 0.3705 0.4797 0.038 Uiso 1 1 calc R . . 
C46 C 0.3712(5) 0.0103(5) 0.3374(4) 0.0471(13) Uani 1 1 d . . . 
N1 N 0.9858(3) -0.1272(3) 0.2347(2) 0.0249(8) Uani 1 1 d . . . 
N2 N 1.0083(3) -0.1238(3) 0.1580(3) 0.0282(8) Uani 1 1 d . . . 
N3 N 0.8723(3) -0.3055(3) 0.1290(2) 0.0260(8) Uani 1 1 d . . . 
N4 N 0.8260(3) 0.0800(3) 0.3369(3) 0.0261(8) Uani 1 1 d . . . 
N5 N 0.7231(3) 0.0781(3) 0.2865(3) 0.0305(9) Uani 1 1 d . . . 
N6 N 0.9028(3) 0.2416(3) 0.3389(3) 0.0265(8) Uani 1 1 d . . . 
N7 N 0.8656(3) 0.2135(3) 0.5708(2) 0.0240(7) Uani 1 1 d . . . 
N8 N 0.8519(3) 0.3077(3) 0.5744(3) 0.0260(8) Uani 1 1 d . . . 
N9 N 0.6875(3) 0.1732(3) 0.5802(3) 0.0260(8) Uani 1 1 d . . . 
Cl1 Cl 0.28862(11) -0.10221(13) 0.22435(11) 0.0582(4) Uani 1 1 d . . . 
Cl2 Cl 0.51102(10) 0.02903(13) 0.34629(10) 0.0545(4) Uani 1 1 d . . . 
Cl3 Cl 0.32445(16) 0.12794(15) 0.35159(13) 0.0731(5) Uani 1 1 d . . . 
H46 H 0.370(4) -0.004(4) 0.391(4) 0.038(13) Uiso 1 1 d . . . 
  
loop_ 
 _atom_site_aniso_label 
 _atom_site_aniso_U_11 
 _atom_site_aniso_U_22 
 _atom_site_aniso_U_33 
 _atom_site_aniso_U_23 
 _atom_site_aniso_U_13 
 _atom_site_aniso_U_12 
Cu1 0.0311(3) 0.0237(4) 0.0269(3) 0.0150(3) 0.0151(3) 0.0101(3) 
Cu2 0.0282(3) 0.0259(4) 0.0263(3) 0.0147(3) 0.0105(3) 0.0086(3) 
Cu3 0.0259(3) 0.0332(4) 0.0261(3) 0.0188(3) 0.0121(3) 0.0120(3) 
S1 0.0264(5) 0.0236(6) 0.0235(5) 0.0139(5) 0.0112(4) 0.0089(4) 
S2 0.0279(5) 0.0270(6) 0.0257(5) 0.0173(5) 0.0110(4) 0.0094(4) 
S3 0.0302(5) 0.0252(6) 0.0250(5) 0.0148(5) 0.0133(4) 0.0123(4) 
C1 0.029(2) 0.028(3) 0.027(2) 0.018(2) 0.0112(18) 0.0139(19) 
C2 0.031(2) 0.033(3) 0.031(2) 0.019(2) 0.0175(19) 0.017(2) 
C3 0.042(2) 0.033(3) 0.026(2) 0.016(2) 0.016(2) 0.018(2) 
C4 0.045(3) 0.038(3) 0.030(2) 0.020(2) 0.017(2) 0.014(2) 
C5 0.060(3) 0.049(4) 0.047(3) 0.031(3) 0.029(3) 0.022(3) 
C6 0.091(4) 0.058(4) 0.041(3) 0.037(3) 0.049(3) 0.047(3) 
C7 0.055(3) 0.053(4) 0.034(3) 0.026(3) 0.019(2) 0.029(3) 
C8 0.046(3) 0.041(3) 0.030(2) 0.019(2) 0.017(2) 0.019(2) 
C9 0.027(2) 0.030(3) 0.024(2) 0.014(2) 0.0117(17) 0.0142(19) 
C10 0.034(2) 0.030(3) 0.027(2) 0.017(2) 0.0115(19) 0.011(2) 
C11 0.036(2) 0.037(3) 0.026(2) 0.018(2) 0.0131(19) 0.015(2) 
C12 0.039(2) 0.041(3) 0.027(2) 0.018(2) 0.017(2) 0.022(2) 
C13 0.041(2) 0.030(3) 0.029(2) 0.012(2) 0.011(2) 0.015(2) 
C14 0.038(2) 0.031(3) 0.029(2) 0.012(2) 0.009(2) 0.001(2) 
C15 0.033(2) 0.044(3) 0.023(2) 0.015(2) 0.0133(19) 0.011(2) 
C16 0.028(2) 0.025(2) 0.030(2) 0.017(2) 0.0149(18) 0.0100(19) 
C17 0.033(2) 0.030(3) 0.028(2) 0.018(2) 0.0105(18) 0.008(2) 
C18 0.032(2) 0.039(3) 0.032(2) 0.024(2) 0.008(2) 0.007(2) 
C19 0.037(2) 0.046(3) 0.041(3) 0.024(3) 0.010(2) 0.016(2) 
C20 0.033(2) 0.047(3) 0.037(3) 0.021(3) 0.005(2) 0.008(2) 
C21 0.031(2) 0.071(4) 0.054(3) 0.044(3) 0.015(2) 0.019(3) 
C22 0.035(2) 0.050(4) 0.060(3) 0.039(3) 0.019(2) 0.020(3) 
C23 0.036(2) 0.042(3) 0.045(3) 0.029(3) 0.017(2) 0.014(2) 
C24 0.032(2) 0.032(3) 0.023(2) 0.017(2) 0.0138(18) 0.015(2) 
C25 0.029(2) 0.032(3) 0.035(2) 0.022(2) 0.0161(19) 0.013(2) 
C26 0.035(2) 0.032(3) 0.030(2) 0.016(2) 0.010(2) 0.011(2) 
C27 0.034(2) 0.028(3) 0.049(3) 0.021(3) 0.015(2) 0.012(2) 
C28 0.033(2) 0.040(3) 0.055(3) 0.037(3) 0.022(2) 0.016(2) 
C29 0.040(2) 0.047(3) 0.039(3) 0.032(3) 0.016(2) 0.014(2) 
C30 0.041(2) 0.034(3) 0.035(3) 0.024(2) 0.012(2) 0.010(2) 
C31 0.029(2) 0.028(3) 0.020(2) 0.015(2) 0.0117(17) 0.0090(19) 
C32 0.031(2) 0.027(3) 0.022(2) 0.013(2) 0.0099(18) 0.0108(19) 
C33 0.035(2) 0.037(3) 0.031(2) 0.022(2) 0.0188(19) 0.019(2) 
C34 0.038(2) 0.028(3) 0.035(3) 0.019(2) 0.018(2) 0.012(2) 
C35 0.064(3) 0.038(3) 0.056(3) 0.028(3) 0.038(3) 0.035(3) 
C36 0.053(3) 0.061(4) 0.064(4) 0.034(3) 0.048(3) 0.032(3) 
C37 0.041(3) 0.044(3) 0.071(4) 0.024(3) 0.037(3) 0.011(3) 
C38 0.037(2) 0.031(3) 0.048(3) 0.022(3) 0.022(2) 0.009(2) 
C39 0.0248(19) 0.026(2) 0.019(2) 0.0084(19) 0.0092(17) 0.0063(18) 
C40 0.036(2) 0.025(2) 0.025(2) 0.015(2) 0.0182(18) 0.016(2) 
C41 0.028(2) 0.030(3) 0.035(2) 0.017(2) 0.0101(19) 0.010(2) 
C42 0.048(3) 0.030(3) 0.043(3) 0.022(2) 0.022(2) 0.009(2) 
C43 0.057(3) 0.028(3) 0.046(3) 0.026(3) 0.026(2) 0.021(2) 
C44 0.041(3) 0.049(3) 0.046(3) 0.032(3) 0.021(2) 0.024(3) 
C45 0.034(2) 0.031(3) 0.043(3) 0.024(2) 0.019(2) 0.015(2) 
C46 0.058(3) 0.055(4) 0.049(3) 0.035(3) 0.027(3) 0.022(3) 
N1 0.0294(17) 0.027(2) 0.0222(18) 0.0135(17) 0.0115(15) 0.0063(16) 
N2 0.0326(18) 0.033(2) 0.025(2) 0.0182(19) 0.0117(16) 0.0101(17) 
N3 0.0281(17) 0.028(2) 0.0223(19) 0.0115(18) 0.0099(15) 0.0091(16) 
N4 0.0305(17) 0.029(2) 0.0266(19) 0.0172(18) 0.0132(15) 0.0111(16) 
N5 0.0280(17) 0.037(2) 0.033(2) 0.022(2) 0.0094(16) 0.0091(17) 
N6 0.0329(18) 0.028(2) 0.0270(19) 0.0174(18) 0.0130(15) 0.0110(16) 
N7 0.0292(17) 0.024(2) 0.0227(18) 0.0126(17) 0.0109(14) 0.0125(16) 
N8 0.0299(17) 0.026(2) 0.0265(19) 0.0135(17) 0.0128(15) 0.0104(16) 
N9 0.0287(17) 0.028(2) 0.0281(19) 0.0159(18) 0.0140(15) 0.0115(16) 
Cl1 0.0428(7) 0.0667(10) 0.0598(9) 0.0350(8) 0.0067(6) -0.0017(7) 
Cl2 0.0409(6) 0.0718(10) 0.0472(8) 0.0271(8) 0.0159(6) 0.0043(7) 
Cl3 0.1141(13) 0.0762(12) 0.0838(11) 0.0611(10) 0.0637(11) 0.0576(11) 
  
_geom_special_details 
; 
 All esds (except the esd in the dihedral angle between two l.s. planes) 
 are estimated using the full covariance matrix.  The cell esds are taken 
 into account individually in the estimation of esds in distances, angles 
 and torsion angles; correlations between esds in cell parameters are only 
 used when they are defined by crystal symmetry.  An approximate (isotropic) 
 treatment of cell esds is used for estimating esds involving l.s. planes. 
; 
  
loop_ 
 _geom_bond_atom_site_label_1 
 _geom_bond_atom_site_label_2 
 _geom_bond_distance 
 _geom_bond_site_symmetry_2 
 _geom_bond_publ_flag 
Cu1 N4 1.994(3) . ? 
Cu1 S1 2.2360(12) . ? 
Cu1 S3 2.2735(11) . ? 
Cu2 N1 1.977(4) . ? 
Cu2 S2 2.2456(13) . ? 
Cu2 S3 2.2555(11) 2_756 ? 
Cu3 N7 1.996(3) . ? 
Cu3 S1 2.2161(11) 2_756 ? 
Cu3 S2 2.2487(11) . ? 
S1 C1 1.761(4) . ? 
S1 Cu3 2.2161(11) 2_756 ? 
S2 C16 1.760(4) . ? 
S3 C31 1.751(4) . ? 
S3 Cu2 2.2555(11) 2_756 ? 
C1 N3 1.333(6) . ? 
C1 N1 1.341(5) . ? 
C2 N2 1.328(6) . ? 
C2 C9 1.421(6) . ? 
C2 C3 1.496(6) . ? 
C3 C8 1.382(6) . ? 
C3 C4 1.388(7) . ? 
C4 C5 1.392(6) . ? 
C4 H4 0.9500 . ? 
C5 C6 1.400(8) . ? 
C5 H5 0.9500 . ? 
C6 C7 1.358(8) . ? 
C6 H6 0.9500 . ? 
C7 C8 1.401(6) . ? 
C7 H7 0.9500 . ? 
C8 H8 0.9500 . ? 
C9 N3 1.345(5) . ? 
C9 C10 1.478(6) . ? 
C10 C11 1.389(6) . ? 
C10 C15 1.393(6) . ? 
C11 C12 1.387(7) . ? 
C11 H11 0.9500 . ? 
C12 C13 1.375(7) . ? 
C12 H12 0.9500 . ? 
C13 C14 1.387(7) . ? 
C13 H13 0.9500 . ? 
C14 C15 1.376(7) . ? 
C14 H14 0.9500 . ? 
C15 H15 0.9500 . ? 
C16 N4 1.340(5) . ? 
C16 N6 1.343(5) . ? 
C17 N5 1.342(6) . ? 
C17 C24 1.425(6) . ? 
C17 C18 1.481(6) . ? 
C18 C19 1.385(7) . ? 
C18 C23 1.397(7) . ? 
C19 C20 1.392(6) . ? 
C19 H19 0.9500 . ? 
C20 C21 1.363(8) . ? 
C20 H20 0.9500 . ? 
C21 C22 1.383(8) . ? 
C21 H21 0.9500 . ? 
C22 C23 1.401(6) . ? 
C22 H22 0.9500 . ? 
C23 H23 0.9500 . ? 
C24 N6 1.329(5) . ? 
C24 C25 1.482(6) . ? 
C25 C26 1.392(6) . ? 
C25 C30 1.402(6) . ? 
C26 C27 1.376(6) . ? 
C26 H26 0.9500 . ? 
C27 C28 1.392(7) . ? 
C27 H27 0.9500 . ? 
C28 C29 1.375(7) . ? 
C28 H28 0.9500 . ? 
C29 C30 1.389(6) . ? 
C29 H29 0.9500 . ? 
C30 H30 0.9500 . ? 
C31 N7 1.340(5) . ? 
C31 N9 1.343(5) . ? 
C32 N9 1.332(6) . ? 
C32 C39 1.433(6) . ? 
C32 C33 1.479(6) . ? 
C33 C38 1.383(6) . ? 
C33 C34 1.393(6) . ? 
C34 C35 1.375(7) . ? 
C34 H34 0.9500 . ? 
C35 C36 1.364(8) . ? 
C35 H35 0.9500 . ? 
C36 C37 1.375(8) . ? 
C36 H36 0.9500 . ? 
C37 C38 1.377(7) . ? 
C37 H37 0.9500 . ? 
C38 H38 0.9500 . ? 
C39 N8 1.324(5) . ? 
C39 C40 1.487(6) . ? 
C40 C41 1.380(6) . ? 
C40 C45 1.386(6) . ? 
C41 C42 1.386(6) . ? 
C41 H41 0.9500 . ? 
C42 C43 1.380(7) . ? 
C42 H42 0.9500 . ? 
C43 C44 1.371(7) . ? 
C43 H43 0.9500 . ? 
C44 C45 1.389(6) . ? 
C44 H44 0.9500 . ? 
C45 H45 0.9500 . ? 
C46 Cl2 1.744(6) . ? 
C46 Cl1 1.746(6) . ? 
C46 Cl3 1.763(6) . ? 
C46 H46 0.96(5) . ? 
N1 N2 1.340(5) . ? 
N4 N5 1.345(5) . ? 
N7 N8 1.336(5) . ? 
  
loop_ 
 _geom_angle_atom_site_label_1 
 _geom_angle_atom_site_label_2 
 _geom_angle_atom_site_label_3 
 _geom_angle 
 _geom_angle_site_symmetry_1 
 _geom_angle_site_symmetry_3 
 _geom_angle_publ_flag 
N4 Cu1 S1 129.45(11) . . ? 
N4 Cu1 S3 114.41(11) . . ? 
S1 Cu1 S3 111.79(4) . . ? 
N1 Cu2 S2 125.63(10) . . ? 
N1 Cu2 S3 124.15(11) . 2_756 ? 
S2 Cu2 S3 106.70(4) . 2_756 ? 
N7 Cu3 S1 125.53(10) . 2_756 ? 
N7 Cu3 S2 110.94(10) . . ? 
S1 Cu3 S2 117.45(4) 2_756 . ? 
C1 S1 Cu3 104.54(13) . 2_756 ? 
C1 S1 Cu1 106.23(15) . . ? 
Cu3 S1 Cu1 88.64(4) 2_756 . ? 
C16 S2 Cu2 107.31(15) . . ? 
C16 S2 Cu3 99.01(13) . . ? 
Cu2 S2 Cu3 93.24(4) . . ? 
C31 S3 Cu2 106.97(14) . 2_756 ? 
C31 S3 Cu1 101.98(13) . . ? 
Cu2 S3 Cu1 100.08(4) 2_756 . ? 
N3 C1 N1 123.9(4) . . ? 
N3 C1 S1 117.7(3) . . ? 
N1 C1 S1 118.4(3) . . ? 
N2 C2 C9 119.7(4) . . ? 
N2 C2 C3 115.1(4) . . ? 
C9 C2 C3 125.1(4) . . ? 
C8 C3 C4 119.8(4) . . ? 
C8 C3 C2 119.5(4) . . ? 
C4 C3 C2 120.4(4) . . ? 
C3 C4 C5 120.1(5) . . ? 
C3 C4 H4 120.0 . . ? 
C5 C4 H4 120.0 . . ? 
C4 C5 C6 119.2(5) . . ? 
C4 C5 H5 120.4 . . ? 
C6 C5 H5 120.4 . . ? 
C7 C6 C5 120.9(4) . . ? 
C7 C6 H6 119.5 . . ? 
C5 C6 H6 119.5 . . ? 
C6 C7 C8 119.7(5) . . ? 
C6 C7 H7 120.2 . . ? 
C8 C7 H7 120.2 . . ? 
C3 C8 C7 120.3(5) . . ? 
C3 C8 H8 119.9 . . ? 
C7 C8 H8 119.9 . . ? 
N3 C9 C2 117.8(4) . . ? 
N3 C9 C10 115.5(4) . . ? 
C2 C9 C10 126.6(4) . . ? 
C11 C10 C15 119.3(4) . . ? 
C11 C10 C9 121.0(4) . . ? 
C15 C10 C9 119.4(4) . . ? 
C12 C11 C10 120.2(4) . . ? 
C12 C11 H11 119.9 . . ? 
C10 C11 H11 119.9 . . ? 
C13 C12 C11 120.0(4) . . ? 
C13 C12 H12 120.0 . . ? 
C11 C12 H12 120.0 . . ? 
C12 C13 C14 120.0(5) . . ? 
C12 C13 H13 120.0 . . ? 
C14 C13 H13 120.0 . . ? 
C15 C14 C13 120.2(4) . . ? 
C15 C14 H14 119.9 . . ? 
C13 C14 H14 119.9 . . ? 
C14 C15 C10 120.1(4) . . ? 
C14 C15 H15 119.9 . . ? 
C10 C15 H15 119.9 . . ? 
N4 C16 N6 124.3(4) . . ? 
N4 C16 S2 118.1(3) . . ? 
N6 C16 S2 117.6(3) . . ? 
N5 C17 C24 119.6(4) . . ? 
N5 C17 C18 114.4(4) . . ? 
C24 C17 C18 126.0(4) . . ? 
C19 C18 C23 119.2(4) . . ? 
C19 C18 C17 120.0(4) . . ? 
C23 C18 C17 120.6(4) . . ? 
C18 C19 C20 120.3(5) . . ? 
C18 C19 H19 119.9 . . ? 
C20 C19 H19 119.9 . . ? 
C21 C20 C19 120.4(5) . . ? 
C21 C20 H20 119.8 . . ? 
C19 C20 H20 119.8 . . ? 
C20 C21 C22 120.8(4) . . ? 
C20 C21 H21 119.6 . . ? 
C22 C21 H21 119.6 . . ? 
C21 C22 C23 119.4(5) . . ? 
C21 C22 H22 120.3 . . ? 
C23 C22 H22 120.3 . . ? 
C18 C23 C22 119.9(5) . . ? 
C18 C23 H23 120.0 . . ? 
C22 C23 H23 120.0 . . ? 
N6 C24 C17 119.8(4) . . ? 
N6 C24 C25 116.0(4) . . ? 
C17 C24 C25 124.2(4) . . ? 
C26 C25 C30 118.9(4) . . ? 
C26 C25 C24 119.7(4) . . ? 
C30 C25 C24 121.4(4) . . ? 
C27 C26 C25 121.1(4) . . ? 
C27 C26 H26 119.5 . . ? 
C25 C26 H26 119.5 . . ? 
C26 C27 C28 119.3(5) . . ? 
C26 C27 H27 120.3 . . ? 
C28 C27 H27 120.3 . . ? 
C29 C28 C27 120.7(4) . . ? 
C29 C28 H28 119.7 . . ? 
C27 C28 H28 119.7 . . ? 
C28 C29 C30 120.0(4) . . ? 
C28 C29 H29 120.0 . . ? 
C30 C29 H29 120.0 . . ? 
C29 C30 C25 119.9(5) . . ? 
C29 C30 H30 120.0 . . ? 
C25 C30 H30 120.0 . . ? 
N7 C31 N9 122.5(4) . . ? 
N7 C31 S3 117.3(3) . . ? 
N9 C31 S3 120.2(3) . . ? 
N9 C32 C39 118.2(4) . . ? 
N9 C32 C33 117.0(4) . . ? 
C39 C32 C33 124.7(4) . . ? 
C38 C33 C34 119.2(4) . . ? 
C38 C33 C32 119.3(4) . . ? 
C34 C33 C32 121.4(4) . . ? 
C35 C34 C33 119.7(4) . . ? 
C35 C34 H34 120.2 . . ? 
C33 C34 H34 120.2 . . ? 
C36 C35 C34 120.9(5) . . ? 
C36 C35 H35 119.6 . . ? 
C34 C35 H35 119.6 . . ? 
C35 C36 C37 119.7(5) . . ? 
C35 C36 H36 120.1 . . ? 
C37 C36 H36 120.1 . . ? 
C36 C37 C38 120.4(5) . . ? 
C36 C37 H37 119.8 . . ? 
C38 C37 H37 119.8 . . ? 
C37 C38 C33 120.0(5) . . ? 
C37 C38 H38 120.0 . . ? 
C33 C38 H38 120.0 . . ? 
N8 C39 C32 119.2(4) . . ? 
N8 C39 C40 114.7(3) . . ? 
C32 C39 C40 126.1(4) . . ? 
C41 C40 C45 119.6(4) . . ? 
C41 C40 C39 119.5(4) . . ? 
C45 C40 C39 120.7(4) . . ? 
C40 C41 C42 120.0(4) . . ? 
C40 C41 H41 120.0 . . ? 
C42 C41 H41 120.0 . . ? 
C43 C42 C41 120.3(4) . . ? 
C43 C42 H42 119.8 . . ? 
C41 C42 H42 119.8 . . ? 
C44 C43 C42 119.8(4) . . ? 
C44 C43 H43 120.1 . . ? 
C42 C43 H43 120.1 . . ? 
C43 C44 C45 120.3(4) . . ? 
C43 C44 H44 119.8 . . ? 
C45 C44 H44 119.8 . . ? 
C40 C45 C44 119.9(4) . . ? 
C40 C45 H45 120.0 . . ? 
C44 C45 H45 120.0 . . ? 
Cl2 C46 Cl1 110.8(3) . . ? 
Cl2 C46 Cl3 111.0(3) . . ? 
Cl1 C46 Cl3 110.5(3) . . ? 
Cl2 C46 H46 104(3) . . ? 
Cl1 C46 H46 109(3) . . ? 
Cl3 C46 H46 111(3) . . ? 
N2 N1 C1 117.5(3) . . ? 
N2 N1 Cu2 122.3(3) . . ? 
C1 N1 Cu2 120.1(3) . . ? 
C2 N2 N1 119.9(4) . . ? 
C1 N3 C9 117.4(4) . . ? 
C16 N4 N5 119.1(3) . . ? 
C16 N4 Cu1 121.5(3) . . ? 
N5 N4 Cu1 118.9(3) . . ? 
C17 N5 N4 119.6(4) . . ? 
C24 N6 C16 117.4(4) . . ? 
N8 N7 C31 119.0(3) . . ? 
N8 N7 Cu3 120.5(3) . . ? 
C31 N7 Cu3 120.2(3) . . ? 
C39 N8 N7 119.5(3) . . ? 
C32 N9 C31 117.8(3) . . ? 
  
loop_ 
 _geom_torsion_atom_site_label_1 
 _geom_torsion_atom_site_label_2 
 _geom_torsion_atom_site_label_3 
 _geom_torsion_atom_site_label_4 
 _geom_torsion 
 _geom_torsion_site_symmetry_1 
 _geom_torsion_site_symmetry_2 
 _geom_torsion_site_symmetry_3 
 _geom_torsion_site_symmetry_4 
 _geom_torsion_publ_flag 
N4 Cu1 S1 C1 30.83(19) . . . . ? 
S3 Cu1 S1 C1 -174.32(14) . . . . ? 
N4 Cu1 S1 Cu3 135.59(13) . . . 2_756 ? 
S3 Cu1 S1 Cu3 -69.56(5) . . . 2_756 ? 
N1 Cu2 S2 C16 31.70(18) . . . . ? 
S3 Cu2 S2 C16 -168.89(14) 2_756 . . . ? 
N1 Cu2 S2 Cu3 132.19(12) . . . . ? 
S3 Cu2 S2 Cu3 -68.40(5) 2_756 . . . ? 
N7 Cu3 S2 C16 -16.36(19) . . . . ? 
S1 Cu3 S2 C16 -170.51(15) 2_756 . . . ? 
N7 Cu3 S2 Cu2 -124.47(12) . . . . ? 
S1 Cu3 S2 Cu2 81.39(5) 2_756 . . . ? 
N4 Cu1 S3 C31 -16.06(18) . . . . ? 
S1 Cu1 S3 C31 -174.93(14) . . . . ? 
N4 Cu1 S3 Cu2 -125.98(12) . . . 2_756 ? 
S1 Cu1 S3 Cu2 75.15(5) . . . 2_756 ? 
Cu3 S1 C1 N3 119.3(3) 2_756 . . . ? 
Cu1 S1 C1 N3 -147.8(3) . . . . ? 
Cu3 S1 C1 N1 -58.7(3) 2_756 . . . ? 
Cu1 S1 C1 N1 34.2(3) . . . . ? 
N2 C2 C3 C8 -138.2(5) . . . . ? 
C9 C2 C3 C8 37.8(7) . . . . ? 
N2 C2 C3 C4 35.7(6) . . . . ? 
C9 C2 C3 C4 -148.3(5) . . . . ? 
C8 C3 C4 C5 -0.1(7) . . . . ? 
C2 C3 C4 C5 -174.0(5) . . . . ? 
C3 C4 C5 C6 1.7(8) . . . . ? 
C4 C5 C6 C7 -2.0(8) . . . . ? 
C5 C6 C7 C8 0.7(8) . . . . ? 
C4 C3 C8 C7 -1.2(7) . . . . ? 
C2 C3 C8 C7 172.8(4) . . . . ? 
C6 C7 C8 C3 0.9(8) . . . . ? 
N2 C2 C9 N3 17.7(6) . . . . ? 
C3 C2 C9 N3 -158.2(4) . . . . ? 
N2 C2 C9 C10 -158.2(4) . . . . ? 
C3 C2 C9 C10 25.9(6) . . . . ? 
N3 C9 C10 C11 -149.8(4) . . . . ? 
C2 C9 C10 C11 26.2(6) . . . . ? 
N3 C9 C10 C15 24.8(5) . . . . ? 
C2 C9 C10 C15 -159.2(4) . . . . ? 
C15 C10 C11 C12 -1.4(6) . . . . ? 
C9 C10 C11 C12 173.3(4) . . . . ? 
C10 C11 C12 C13 -0.4(6) . . . . ? 
C11 C12 C13 C14 2.3(6) . . . . ? 
C12 C13 C14 C15 -2.4(6) . . . . ? 
C13 C14 C15 C10 0.6(6) . . . . ? 
C11 C10 C15 C14 1.3(6) . . . . ? 
C9 C10 C15 C14 -173.5(4) . . . . ? 
Cu2 S2 C16 N4 37.1(4) . . . . ? 
Cu3 S2 C16 N4 -59.1(3) . . . . ? 
Cu2 S2 C16 N6 -142.1(3) . . . . ? 
Cu3 S2 C16 N6 121.6(3) . . . . ? 
N5 C17 C18 C19 -43.5(6) . . . . ? 
C24 C17 C18 C19 137.3(5) . . . . ? 
N5 C17 C18 C23 131.1(4) . . . . ? 
C24 C17 C18 C23 -48.0(6) . . . . ? 
C23 C18 C19 C20 -1.0(7) . . . . ? 
C17 C18 C19 C20 173.7(4) . . . . ? 
C18 C19 C20 C21 -0.1(7) . . . . ? 
C19 C20 C21 C22 0.1(7) . . . . ? 
C20 C21 C22 C23 1.0(7) . . . . ? 
C19 C18 C23 C22 2.2(6) . . . . ? 
C17 C18 C23 C22 -172.5(4) . . . . ? 
C21 C22 C23 C18 -2.2(7) . . . . ? 
N5 C17 C24 N6 -4.3(7) . . . . ? 
C18 C17 C24 N6 174.8(4) . . . . ? 
N5 C17 C24 C25 175.6(4) . . . . ? 
C18 C17 C24 C25 -5.3(7) . . . . ? 
N6 C24 C25 C26 -45.0(6) . . . . ? 
C17 C24 C25 C26 135.0(5) . . . . ? 
N6 C24 C25 C30 133.5(4) . . . . ? 
C17 C24 C25 C30 -46.5(6) . . . . ? 
C30 C25 C26 C27 -0.4(7) . . . . ? 
C24 C25 C26 C27 178.1(4) . . . . ? 
C25 C26 C27 C28 -1.2(7) . . . . ? 
C26 C27 C28 C29 1.3(7) . . . . ? 
C27 C28 C29 C30 0.3(7) . . . . ? 
C28 C29 C30 C25 -2.0(7) . . . . ? 
C26 C25 C30 C29 2.0(7) . . . . ? 
C24 C25 C30 C29 -176.4(4) . . . . ? 
Cu2 S3 C31 N7 56.9(3) 2_756 . . . ? 
Cu1 S3 C31 N7 -47.7(3) . . . . ? 
Cu2 S3 C31 N9 -123.5(3) 2_756 . . . ? 
Cu1 S3 C31 N9 131.9(3) . . . . ? 
N9 C32 C33 C38 -26.9(6) . . . . ? 
C39 C32 C33 C38 155.8(4) . . . . ? 
N9 C32 C33 C34 148.5(4) . . . . ? 
C39 C32 C33 C34 -28.8(6) . . . . ? 
C38 C33 C34 C35 0.2(6) . . . . ? 
C32 C33 C34 C35 -175.2(4) . . . . ? 
C33 C34 C35 C36 -2.0(7) . . . . ? 
C34 C35 C36 C37 1.4(8) . . . . ? 
C35 C36 C37 C38 1.0(9) . . . . ? 
C36 C37 C38 C33 -2.8(8) . . . . ? 
C34 C33 C38 C37 2.2(7) . . . . ? 
C32 C33 C38 C37 177.7(4) . . . . ? 
N9 C32 C39 N8 -18.0(6) . . . . ? 
C33 C32 C39 N8 159.3(4) . . . . ? 
N9 C32 C39 C40 160.4(4) . . . . ? 
C33 C32 C39 C40 -22.3(6) . . . . ? 
N8 C39 C40 C41 -36.5(6) . . . . ? 
C32 C39 C40 C41 145.0(4) . . . . ? 
N8 C39 C40 C45 138.6(4) . . . . ? 
C32 C39 C40 C45 -40.0(6) . . . . ? 
C45 C40 C41 C42 -2.0(7) . . . . ? 
C39 C40 C41 C42 173.2(4) . . . . ? 
C40 C41 C42 C43 1.7(7) . . . . ? 
C41 C42 C43 C44 -0.3(7) . . . . ? 
C42 C43 C44 C45 -0.8(7) . . . . ? 
C41 C40 C45 C44 0.8(7) . . . . ? 
C39 C40 C45 C44 -174.2(4) . . . . ? 
C43 C44 C45 C40 0.6(7) . . . . ? 
N3 C1 N1 N2 19.5(6) . . . . ? 
S1 C1 N1 N2 -162.6(3) . . . . ? 
N3 C1 N1 Cu2 -163.8(3) . . . . ? 
S1 C1 N1 Cu2 14.0(4) . . . . ? 
S2 Cu2 N1 N2 62.2(3) . . . . ? 
S3 Cu2 N1 N2 -93.8(3) 2_756 . . . ? 
S2 Cu2 N1 C1 -114.3(3) . . . . ? 
S3 Cu2 N1 C1 89.7(3) 2_756 . . . ? 
C9 C2 N2 N1 -8.7(6) . . . . ? 
C3 C2 N2 N1 167.6(4) . . . . ? 
C1 N1 N2 C2 -9.1(5) . . . . ? 
Cu2 N1 N2 C2 174.3(3) . . . . ? 
N1 C1 N3 C9 -10.2(6) . . . . ? 
S1 C1 N3 C9 171.9(3) . . . . ? 
C2 C9 N3 C1 -8.2(5) . . . . ? 
C10 C9 N3 C1 168.2(3) . . . . ? 
N6 C16 N4 N5 -2.3(6) . . . . ? 
S2 C16 N4 N5 178.5(3) . . . . ? 
N6 C16 N4 Cu1 -173.8(3) . . . . ? 
S2 C16 N4 Cu1 6.9(5) . . . . ? 
S1 Cu1 N4 C16 -107.2(3) . . . . ? 
S3 Cu1 N4 C16 98.5(3) . . . . ? 
S1 Cu1 N4 N5 81.2(3) . . . . ? 
S3 Cu1 N4 N5 -73.1(3) . . . . ? 
C24 C17 N5 N4 1.9(6) . . . . ? 
C18 C17 N5 N4 -177.3(4) . . . . ? 
C16 N4 N5 C17 1.3(6) . . . . ? 
Cu1 N4 N5 C17 173.1(3) . . . . ? 
C17 C24 N6 C16 3.4(6) . . . . ? 
C25 C24 N6 C16 -176.6(4) . . . . ? 
N4 C16 N6 C24 -0.1(6) . . . . ? 
S2 C16 N6 C24 179.1(3) . . . . ? 
N9 C31 N7 N8 -18.3(6) . . . . ? 
S3 C31 N7 N8 161.3(3) . . . . ? 
N9 C31 N7 Cu3 168.8(3) . . . . ? 
S3 C31 N7 Cu3 -11.6(4) . . . . ? 
S1 Cu3 N7 N8 93.7(3) 2_756 . . . ? 
S2 Cu3 N7 N8 -57.9(3) . . . . ? 
S1 Cu3 N7 C31 -93.5(3) 2_756 . . . ? 
S2 Cu3 N7 C31 114.9(3) . . . . ? 
C32 C39 N8 N7 10.3(6) . . . . ? 
C40 C39 N8 N7 -168.3(3) . . . . ? 
C31 N7 N8 C39 7.2(5) . . . . ? 
Cu3 N7 N8 C39 -179.9(3) . . . . ? 
C39 C32 N9 C31 7.7(6) . . . . ? 
C33 C32 N9 C31 -169.8(4) . . . . ? 
N7 C31 N9 C32 10.2(6) . . . . ? 
S3 C31 N9 C32 -169.4(3) . . . . ? 
  
_diffrn_measured_fraction_theta_max    0.926 
_diffrn_reflns_theta_full              66.99 
_diffrn_measured_fraction_theta_full   0.926 
_refine_diff_density_max    0.636 
_refine_diff_density_min   -0.379 
_refine_diff_density_rms    0.091 

#===END 

  
data_complex3_m 
  
_audit_creation_method            SHELXL-97 
_chemical_name_systematic 
; 
 ? 
; 
_chemical_name_common             ? 
_chemical_melting_point           ? 
_chemical_formula_moiety          ? 
_chemical_formula_sum 
 'C45 H30 Co N9 S6' 
_chemical_formula_weight          948.07 
  
loop_ 
 _atom_type_symbol 
 _atom_type_description 
 _atom_type_scat_dispersion_real 
 _atom_type_scat_dispersion_imag 
 _atom_type_scat_source 
 'C'  'C'   0.0181   0.0091 
 'International Tables Vol C Tables 4.2.6.8 and 6.1.1.4' 
 'H'  'H'   0.0000   0.0000 
 'International Tables Vol C Tables 4.2.6.8 and 6.1.1.4' 
 'N'  'N'   0.0311   0.0180 
 'International Tables Vol C Tables 4.2.6.8 and 6.1.1.4' 
 'S'  'S'   0.3331   0.5567 
 'International Tables Vol C Tables 4.2.6.8 and 6.1.1.4' 
 'Co'  'Co'  -2.3653   3.6143 
 'International Tables Vol C Tables 4.2.6.8 and 6.1.1.4' 
  
_symmetry_cell_setting            Orthorhombic 
_symmetry_space_group_name_H-M    Pbca 
  
loop_ 
 _symmetry_equiv_pos_as_xyz 
 'x, y, z' 
 '-x+1/2, -y, z+1/2' 
 '-x, y+1/2, -z+1/2' 
 'x+1/2, -y+1/2, -z' 
 '-x, -y, -z' 
 'x-1/2, y, -z-1/2' 
 'x, -y-1/2, z-1/2' 
 '-x-1/2, y-1/2, z' 
  
_cell_length_a                    18.4406(3) 
_cell_length_b                    20.4177(3) 
_cell_length_c                    23.5628(3) 
_cell_angle_alpha                 90.00 
_cell_angle_beta                  90.00 
_cell_angle_gamma                 90.00 
_cell_volume                      8871.7(2) 
_cell_formula_units_Z             8 
_cell_measurement_temperature     298(2) 
_cell_measurement_reflns_used     ? 
_cell_measurement_theta_min       ? 
_cell_measurement_theta_max       ? 
  
_exptl_crystal_description        prisma 
_exptl_crystal_colour             black 
_exptl_crystal_size_max           0.20 
_exptl_crystal_size_mid           0.17 
_exptl_crystal_size_min           0.13 
_exptl_crystal_density_meas       0 
_exptl_crystal_density_diffrn     1.420 
_exptl_crystal_density_method     'not measured' 
_exptl_crystal_F_000              3888 
_exptl_absorpt_coefficient_mu     6.027 
_exptl_absorpt_correction_type    multi-scan 
_exptl_absorpt_correction_T_min   0.345 
_exptl_absorpt_correction_T_max   0.457 
_exptl_absorpt_process_details    'SADABS (Sheldrick, 2001)' 
  
_exptl_special_details 
; 
 ? 
; 
  
_diffrn_ambient_temperature       298(2) 
_diffrn_radiation_wavelength      1.54178 
_diffrn_radiation_type            CuK\a 
_diffrn_radiation_source          'fine-focus sealed tube' 
_diffrn_radiation_monochromator   graphite 
_diffrn_measurement_device_type   'CCD area detector' 
_diffrn_measurement_method        'phi and omega scans' 
_diffrn_detector_area_resol_mean  ? 
_diffrn_standards_number          ? 
_diffrn_standards_interval_count  ? 
_diffrn_standards_interval_time   ? 
_diffrn_standards_decay_%         ? 
_diffrn_reflns_number             54959 
_diffrn_reflns_av_R_equivalents   0.0451 
_diffrn_reflns_av_sigmaI/netI     0.0277 
_diffrn_reflns_limit_h_min        -21 
_diffrn_reflns_limit_h_max        21 
_diffrn_reflns_limit_k_min        -22 
_diffrn_reflns_limit_k_max        24 
_diffrn_reflns_limit_l_min        -28 
_diffrn_reflns_limit_l_max        27 
_diffrn_reflns_theta_min          3.73 
_diffrn_reflns_theta_max          70.57 
_reflns_number_total              8370 
_reflns_number_gt                 6707 
_reflns_threshold_expression      >2sigma(I) 
  
_computing_data_collection        'Bruker SMART' 
_computing_cell_refinement        'Bruker SMART' 
_computing_data_reduction         'Bruker SAINT' 
_computing_structure_solution     'SHELXS-97 (Sheldrick, 1990)' 
_computing_structure_refinement   'SHELXL-97 (Sheldrick, 1997)' 
_computing_molecular_graphics     'Bruker SHELXTL' 
_computing_publication_material   'Bruker SHELXTL' 
  
_refine_special_details 
; 
 Refinement of F^2^ against ALL reflections.  The weighted R-factor wR and 
 goodness of fit S are based on F^2^, conventional R-factors R are based 
 on F, with F set to zero for negative F^2^. The threshold expression of 
 F^2^ > 2sigma(F^2^) is used only for calculating R-factors(gt) etc. and is 
 not relevant to the choice of reflections for refinement.  R-factors based 
 on F^2^ are statistically about twice as large as those based on F, and R- 
 factors based on ALL data will be even larger. 
; 
  
_refine_ls_structure_factor_coef  Fsqd 
_refine_ls_matrix_type            full 
_refine_ls_weighting_scheme       calc 
_refine_ls_weighting_details 
 'calc w=1/[\s^2^(Fo^2^)+(0.0734P)^2^+3.7657P] where P=(Fo^2^+2Fc^2^)/3' 
_atom_sites_solution_primary      direct 
_atom_sites_solution_secondary    difmap 
_atom_sites_solution_hydrogens    geom 
_refine_ls_hydrogen_treatment     constr 
_refine_ls_extinction_method      none 
_refine_ls_extinction_coef        ? 
_refine_ls_number_reflns          8370 
_refine_ls_number_parameters      550 
_refine_ls_number_restraints      0 
_refine_ls_R_factor_all           0.0584 
_refine_ls_R_factor_gt            0.0455 
_refine_ls_wR_factor_ref          0.1297 
_refine_ls_wR_factor_gt           0.1206 
_refine_ls_goodness_of_fit_ref    1.028 
_refine_ls_restrained_S_all       1.028 
_refine_ls_shift/su_max           0.001 
_refine_ls_shift/su_mean          0.000 
  
loop_ 
 _atom_site_label 
 _atom_site_type_symbol 
 _atom_site_fract_x 
 _atom_site_fract_y 
 _atom_site_fract_z 
 _atom_site_U_iso_or_equiv 
 _atom_site_adp_type 
 _atom_site_occupancy 
 _atom_site_symmetry_multiplicity 
 _atom_site_calc_flag 
 _atom_site_refinement_flags 
 _atom_site_disorder_assembly 
 _atom_site_disorder_group 
Co1 Co 0.51406(2) 0.138658(19) 0.428445(19) 0.04199(13) Uani 1 1 d . . . 
S1 S 0.59760(5) 0.05987(4) 0.42703(4) 0.0622(2) Uani 1 1 d . . . 
S2 S 0.68735(4) 0.11259(4) 0.40114(4) 0.0590(2) Uani 1 1 d . . . 
S3 S 0.47246(5) 0.08715(4) 0.35146(4) 0.0600(2) Uani 1 1 d . . . 
S4 S 0.39031(6) 0.14915(5) 0.32733(5) 0.0844(3) Uani 1 1 d . . . 
S5 S 0.44539(5) 0.06780(4) 0.47468(4) 0.0625(2) Uani 1 1 d . . . 
S6 S 0.46449(6) 0.09471(4) 0.55765(4) 0.0712(3) Uani 1 1 d . . . 
C1 C 0.64917(15) 0.18552(13) 0.37836(11) 0.0451(6) Uani 1 1 d . . . 
C2 C 0.67147(15) 0.28657(14) 0.34274(12) 0.0480(6) Uani 1 1 d . . . 
C3 C 0.72663(17) 0.33745(15) 0.33013(13) 0.0563(7) Uani 1 1 d . . . 
C4 C 0.79365(19) 0.31910(19) 0.30946(17) 0.0735(10) Uani 1 1 d . . . 
H4 H 0.8023 0.2756 0.2999 0.088 Uiso 1 1 calc R . . 
C5 C 0.8487(2) 0.3657(2) 0.30281(19) 0.0878(13) Uani 1 1 d . . . 
H5 H 0.8936 0.3534 0.2883 0.105 Uiso 1 1 calc R . . 
C6 C 0.8361(3) 0.4294(2) 0.3178(2) 0.0944(14) Uani 1 1 d . . . 
H6 H 0.8731 0.4602 0.3145 0.113 Uiso 1 1 calc R . . 
C7 C 0.7702(3) 0.4479(2) 0.33723(19) 0.0921(14) Uani 1 1 d . . . 
H7 H 0.7619 0.4916 0.3464 0.111 Uiso 1 1 calc R . . 
C8 C 0.7149(2) 0.40279(17) 0.34368(16) 0.0744(10) Uani 1 1 d . . . 
H8 H 0.6698 0.4162 0.3571 0.089 Uiso 1 1 calc R . . 
C9 C 0.59505(15) 0.29619(13) 0.34061(12) 0.0465(6) Uani 1 1 d . . . 
C10 C 0.55871(17) 0.35513(14) 0.31652(14) 0.0552(7) Uani 1 1 d . . . 
C11 C 0.5731(2) 0.37565(17) 0.26152(15) 0.0682(9) Uani 1 1 d . . . 
H11 H 0.6049 0.3519 0.2388 0.082 Uiso 1 1 calc R . . 
C12 C 0.5401(2) 0.4313(2) 0.2405(2) 0.0851(12) Uani 1 1 d . . . 
H12 H 0.5499 0.4450 0.2036 0.102 Uiso 1 1 calc R . . 
C13 C 0.4936(2) 0.4660(2) 0.2734(2) 0.0890(13) Uani 1 1 d . . . 
H13 H 0.4721 0.5037 0.2590 0.107 Uiso 1 1 calc R . . 
C14 C 0.4778(2) 0.4461(2) 0.3274(2) 0.0900(13) Uani 1 1 d . . . 
H14 H 0.4456 0.4702 0.3495 0.108 Uiso 1 1 calc R . . 
C15 C 0.5100(2) 0.38969(18) 0.34924(18) 0.0746(10) Uani 1 1 d . . . 
H15 H 0.4987 0.3755 0.3857 0.089 Uiso 1 1 calc R . . 
C16 C 0.39042(16) 0.20727(15) 0.38082(14) 0.0554(7) Uani 1 1 d . . . 
C17 C 0.33808(15) 0.30158(14) 0.41371(13) 0.0494(6) Uani 1 1 d . . . 
C18 C 0.28575(16) 0.35495(14) 0.40252(13) 0.0533(7) Uani 1 1 d . . . 
C19 C 0.2820(2) 0.3808(2) 0.34815(16) 0.0778(10) Uani 1 1 d . . . 
H19 H 0.3129 0.3653 0.3200 0.093 Uiso 1 1 calc R . . 
C20 C 0.2327(3) 0.4295(2) 0.33562(19) 0.0962(14) Uani 1 1 d . . . 
H20 H 0.2310 0.4473 0.2993 0.115 Uiso 1 1 calc R . . 
C21 C 0.1859(2) 0.4515(2) 0.3772(2) 0.0839(12) Uani 1 1 d . . . 
H21 H 0.1527 0.4844 0.3688 0.101 Uiso 1 1 calc R . . 
C22 C 0.18793(18) 0.42563(16) 0.42991(16) 0.0649(9) Uani 1 1 d . . . 
H22 H 0.1551 0.4401 0.4572 0.078 Uiso 1 1 calc R . . 
C23 C 0.23827(16) 0.37783(15) 0.44396(14) 0.0555(7) Uani 1 1 d . . . 
H23 H 0.2403 0.3612 0.4807 0.067 Uiso 1 1 calc R . . 
C24 C 0.38280(15) 0.29563(13) 0.46284(12) 0.0475(6) Uani 1 1 d . . . 
C25 C 0.38396(16) 0.34120(15) 0.51191(14) 0.0553(7) Uani 1 1 d . . . 
C26 C 0.3960(2) 0.40745(18) 0.50410(19) 0.0819(11) Uani 1 1 d . . . 
H26 H 0.4006 0.4248 0.4678 0.098 Uiso 1 1 calc R . . 
C27 C 0.4011(3) 0.4479(2) 0.5521(3) 0.1058(16) Uani 1 1 d . . . 
H27 H 0.4098 0.4924 0.5474 0.127 Uiso 1 1 calc R . . 
C28 C 0.3935(3) 0.4231(3) 0.6056(2) 0.0994(15) Uani 1 1 d . . . 
H28 H 0.3967 0.4507 0.6369 0.119 Uiso 1 1 calc R . . 
C29 C 0.3813(2) 0.3577(2) 0.61308(19) 0.0914(13) Uani 1 1 d . . . 
H29 H 0.3758 0.3407 0.6495 0.110 Uiso 1 1 calc R . . 
C30 C 0.3770(2) 0.31659(19) 0.56631(15) 0.0712(10) Uani 1 1 d . . . 
H30 H 0.3694 0.2720 0.5716 0.085 Uiso 1 1 calc R . . 
C31 C 0.52391(16) 0.15911(14) 0.55026(13) 0.0513(7) Uani 1 1 d . . . 
C32 C 0.61387(15) 0.25930(14) 0.54151(12) 0.0481(6) Uani 1 1 d . . . 
C33 C 0.66187(18) 0.31614(15) 0.53077(13) 0.0552(7) Uani 1 1 d . . . 
C34 C 0.72229(18) 0.30839(16) 0.49609(15) 0.0623(8) Uani 1 1 d . . . 
H34 H 0.7327 0.2673 0.4811 0.075 Uiso 1 1 calc R . . 
C35 C 0.7665(2) 0.3600(2) 0.48359(19) 0.0809(11) Uani 1 1 d . . . 
H35 H 0.8069 0.3540 0.4605 0.097 Uiso 1 1 calc R . . 
C36 C 0.7511(3) 0.4211(2) 0.5053(2) 0.0983(14) Uani 1 1 d . . . 
H36 H 0.7809 0.4564 0.4966 0.118 Uiso 1 1 calc R . . 
C37 C 0.6922(3) 0.43017(19) 0.5396(2) 0.0964(14) Uani 1 1 d . . . 
H37 H 0.6826 0.4714 0.5545 0.116 Uiso 1 1 calc R . . 
C38 C 0.6463(2) 0.37783(18) 0.55236(18) 0.0778(10) Uani 1 1 d . . . 
H38 H 0.6057 0.3842 0.5751 0.093 Uiso 1 1 calc R . . 
C39 C 0.58559(16) 0.23995(15) 0.59544(12) 0.0518(7) Uani 1 1 d . . . 
C40 C 0.60243(18) 0.27539(16) 0.64853(13) 0.0581(8) Uani 1 1 d . . . 
C41 C 0.6715(2) 0.2941(2) 0.66290(17) 0.0850(12) Uani 1 1 d . . . 
H41 H 0.7104 0.2809 0.6406 0.102 Uiso 1 1 calc R . . 
C42 C 0.6835(3) 0.3327(3) 0.71063(19) 0.1011(14) Uani 1 1 d . . . 
H42 H 0.7303 0.3452 0.7203 0.121 Uiso 1 1 calc R . . 
C43 C 0.6260(3) 0.3520(2) 0.74323(17) 0.0945(14) Uani 1 1 d . . . 
H43 H 0.6332 0.3799 0.7739 0.113 Uiso 1 1 calc R . . 
C44 C 0.5584(3) 0.3302(2) 0.73054(17) 0.0946(14) Uani 1 1 d . . . 
H44 H 0.5197 0.3415 0.7539 0.114 Uiso 1 1 calc R . . 
C45 C 0.5466(2) 0.2921(2) 0.68429(15) 0.0744(10) Uani 1 1 d . . . 
H45 H 0.5000 0.2770 0.6767 0.089 Uiso 1 1 calc R . . 
N1 N 0.57795(12) 0.19673(10) 0.38395(9) 0.0433(5) Uani 1 1 d . . . 
N2 N 0.55093(12) 0.25220(11) 0.36250(10) 0.0468(5) Uani 1 1 d . . . 
N3 N 0.69683(13) 0.22922(11) 0.35927(10) 0.0494(5) Uani 1 1 d . . . 
N4 N 0.43525(13) 0.20268(11) 0.42487(10) 0.0467(5) Uani 1 1 d . . . 
N5 N 0.42982(12) 0.24681(11) 0.46661(10) 0.0480(5) Uani 1 1 d . . . 
N6 N 0.34280(13) 0.25629(13) 0.37337(11) 0.0572(6) Uani 1 1 d . . . 
N7 N 0.54968(12) 0.17616(10) 0.49908(10) 0.0456(5) Uani 1 1 d . . . 
N8 N 0.59532(13) 0.22695(11) 0.49546(10) 0.0482(5) Uani 1 1 d . . . 
N9 N 0.54114(14) 0.18993(13) 0.59858(11) 0.0562(6) Uani 1 1 d . . . 
  
loop_ 
 _atom_site_aniso_label 
 _atom_site_aniso_U_11 
 _atom_site_aniso_U_22 
 _atom_site_aniso_U_33 
 _atom_site_aniso_U_23 
 _atom_site_aniso_U_13 
 _atom_site_aniso_U_12 
Co1 0.0447(2) 0.0292(2) 0.0520(3) 0.00024(17) 0.01056(19) -0.00320(16) 
S1 0.0643(5) 0.0353(3) 0.0872(6) 0.0064(3) 0.0192(4) 0.0034(3) 
S2 0.0541(4) 0.0470(4) 0.0758(5) 0.0085(4) 0.0113(4) 0.0065(3) 
S3 0.0705(5) 0.0429(4) 0.0666(5) -0.0142(3) 0.0101(4) -0.0065(3) 
S4 0.0754(6) 0.0894(7) 0.0883(7) -0.0437(5) -0.0184(5) 0.0170(5) 
S5 0.0702(5) 0.0432(4) 0.0741(5) 0.0021(3) 0.0203(4) -0.0145(3) 
S6 0.0870(6) 0.0586(5) 0.0679(5) 0.0068(4) 0.0224(4) -0.0185(4) 
C1 0.0513(15) 0.0398(14) 0.0441(14) -0.0024(11) 0.0037(12) -0.0020(11) 
C2 0.0531(16) 0.0446(15) 0.0463(14) 0.0013(12) 0.0032(12) -0.0071(12) 
C3 0.0572(18) 0.0570(18) 0.0545(17) 0.0088(14) -0.0029(14) -0.0164(14) 
C4 0.061(2) 0.077(2) 0.083(2) 0.0144(19) 0.0048(18) -0.0177(17) 
C5 0.061(2) 0.108(3) 0.094(3) 0.021(2) 0.002(2) -0.029(2) 
C6 0.093(3) 0.094(3) 0.095(3) 0.017(2) -0.013(3) -0.055(3) 
C7 0.110(4) 0.069(2) 0.098(3) -0.002(2) -0.008(3) -0.046(2) 
C8 0.081(2) 0.059(2) 0.083(2) 0.0006(18) -0.0038(19) -0.0247(18) 
C9 0.0509(16) 0.0387(14) 0.0499(15) 0.0039(11) 0.0017(12) -0.0052(11) 
C10 0.0548(17) 0.0413(15) 0.0697(19) 0.0137(13) -0.0033(15) -0.0073(12) 
C11 0.075(2) 0.061(2) 0.069(2) 0.0193(17) -0.0021(17) -0.0079(16) 
C12 0.092(3) 0.074(3) 0.090(3) 0.038(2) -0.014(2) -0.010(2) 
C13 0.083(3) 0.058(2) 0.125(4) 0.034(2) -0.023(3) -0.004(2) 
C14 0.078(3) 0.062(2) 0.130(4) 0.013(2) 0.004(2) 0.0152(19) 
C15 0.076(2) 0.057(2) 0.090(3) 0.0185(19) 0.012(2) 0.0092(17) 
C16 0.0484(16) 0.0531(17) 0.0646(19) -0.0119(14) 0.0063(14) -0.0035(13) 
C17 0.0423(15) 0.0497(16) 0.0562(16) -0.0033(13) 0.0022(12) -0.0003(12) 
C18 0.0504(17) 0.0519(16) 0.0577(17) -0.0026(13) -0.0029(13) 0.0050(13) 
C19 0.083(3) 0.087(3) 0.063(2) 0.0041(19) -0.0017(18) 0.021(2) 
C20 0.109(3) 0.103(3) 0.076(3) 0.017(2) -0.018(2) 0.029(3) 
C21 0.077(3) 0.072(2) 0.103(3) -0.003(2) -0.025(2) 0.026(2) 
C22 0.0535(18) 0.0549(19) 0.086(2) -0.0108(17) -0.0020(17) 0.0082(14) 
C23 0.0515(17) 0.0508(16) 0.0642(18) -0.0023(14) 0.0010(14) 0.0023(13) 
C24 0.0461(15) 0.0388(14) 0.0576(16) -0.0026(12) 0.0040(12) 0.0024(11) 
C25 0.0501(16) 0.0494(16) 0.066(2) -0.0122(14) -0.0092(14) 0.0097(13) 
C26 0.100(3) 0.053(2) 0.092(3) -0.0150(19) -0.009(2) 0.0020(19) 
C27 0.123(4) 0.059(2) 0.135(4) -0.038(3) -0.025(3) 0.007(2) 
C28 0.102(3) 0.099(4) 0.097(3) -0.048(3) -0.029(3) 0.022(3) 
C29 0.096(3) 0.111(4) 0.068(2) -0.020(2) -0.016(2) 0.027(3) 
C30 0.081(2) 0.069(2) 0.064(2) -0.0137(17) -0.0107(18) 0.0145(18) 
C31 0.0532(17) 0.0425(15) 0.0582(17) 0.0077(13) 0.0115(13) 0.0046(12) 
C32 0.0497(15) 0.0442(15) 0.0505(15) -0.0027(12) 0.0018(12) 0.0030(12) 
C33 0.0609(18) 0.0482(16) 0.0564(17) -0.0035(13) -0.0049(14) -0.0080(13) 
C34 0.0618(19) 0.0585(18) 0.0667(19) -0.0045(15) 0.0000(16) -0.0109(15) 
C35 0.069(2) 0.083(3) 0.091(3) 0.001(2) 0.002(2) -0.0274(19) 
C36 0.089(3) 0.070(3) 0.136(4) 0.008(3) -0.016(3) -0.033(2) 
C37 0.108(4) 0.050(2) 0.131(4) -0.014(2) -0.009(3) -0.015(2) 
C38 0.084(3) 0.057(2) 0.092(3) -0.0144(19) 0.002(2) -0.0041(18) 
C39 0.0532(16) 0.0527(17) 0.0496(15) -0.0001(13) 0.0035(13) 0.0126(13) 
C40 0.068(2) 0.0588(18) 0.0475(16) -0.0013(14) -0.0006(14) 0.0134(15) 
C41 0.067(2) 0.118(3) 0.070(2) -0.017(2) -0.0043(19) 0.012(2) 
C42 0.100(3) 0.134(4) 0.070(3) -0.013(3) -0.024(2) -0.006(3) 
C43 0.139(4) 0.095(3) 0.049(2) -0.0112(19) -0.009(2) 0.012(3) 
C44 0.116(4) 0.107(3) 0.061(2) -0.021(2) 0.015(2) 0.021(3) 
C45 0.076(2) 0.092(3) 0.0546(19) -0.0063(18) 0.0078(17) 0.016(2) 
N1 0.0498(13) 0.0338(11) 0.0462(12) 0.0017(9) 0.0053(10) -0.0047(9) 
N2 0.0501(13) 0.0382(12) 0.0521(12) 0.0047(10) 0.0039(10) -0.0036(10) 
N3 0.0472(13) 0.0477(13) 0.0533(13) 0.0030(10) 0.0059(11) -0.0054(10) 
N4 0.0468(13) 0.0369(11) 0.0565(14) -0.0045(10) 0.0080(11) -0.0036(9) 
N5 0.0491(13) 0.0393(12) 0.0556(13) -0.0009(10) 0.0029(10) -0.0004(10) 
N6 0.0487(13) 0.0597(15) 0.0631(15) -0.0115(12) -0.0007(12) 0.0043(11) 
N7 0.0498(13) 0.0343(11) 0.0525(13) 0.0015(9) 0.0075(10) 0.0007(9) 
N8 0.0507(13) 0.0420(12) 0.0518(13) -0.0011(10) 0.0063(10) -0.0041(10) 
N9 0.0647(16) 0.0528(15) 0.0509(14) 0.0031(11) 0.0100(12) 0.0055(12) 
  
_geom_special_details 
; 
 All esds (except the esd in the dihedral angle between two l.s. planes) 
 are estimated using the full covariance matrix.  The cell esds are taken 
 into account individually in the estimation of esds in distances, angles 
 and torsion angles; correlations between esds in cell parameters are only 
 used when they are defined by crystal symmetry.  An approximate (isotropic) 
 treatment of cell esds is used for estimating esds involving l.s. planes. 
; 
  
loop_ 
 _geom_bond_atom_site_label_1 
 _geom_bond_atom_site_label_2 
 _geom_bond_distance 
 _geom_bond_site_symmetry_2 
 _geom_bond_publ_flag 
Co1 N7 1.946(2) . ? 
Co1 N4 1.956(2) . ? 
Co1 N1 1.973(2) . ? 
Co1 S5 2.2098(8) . ? 
Co1 S1 2.2277(9) . ? 
Co1 S3 2.2327(9) . ? 
S1 S2 2.0665(11) . ? 
S2 C1 1.732(3) . ? 
S3 S4 2.0544(13) . ? 
S4 C16 1.731(3) . ? 
S5 S6 2.0611(13) . ? 
S6 C31 1.721(3) . ? 
C1 N3 1.331(3) . ? 
C1 N1 1.340(4) . ? 
C2 N3 1.320(4) . ? 
C2 C9 1.424(4) . ? 
C2 C3 1.484(4) . ? 
C3 C4 1.380(5) . ? 
C3 C8 1.389(5) . ? 
C4 C5 1.400(5) . ? 
C4 H4 0.9300 . ? 
C5 C6 1.367(6) . ? 
C5 H5 0.9300 . ? 
C6 C7 1.354(7) . ? 
C6 H6 0.9300 . ? 
C7 C8 1.383(5) . ? 
C7 H7 0.9300 . ? 
C8 H8 0.9300 . ? 
C9 N2 1.317(3) . ? 
C9 C10 1.490(4) . ? 
C10 C15 1.378(5) . ? 
C10 C11 1.388(5) . ? 
C11 C12 1.380(5) . ? 
C11 H11 0.9300 . ? 
C12 C13 1.357(6) . ? 
C12 H12 0.9300 . ? 
C13 C14 1.367(7) . ? 
C13 H13 0.9300 . ? 
C14 C15 1.394(5) . ? 
C14 H14 0.9300 . ? 
C15 H15 0.9300 . ? 
C16 N4 1.330(4) . ? 
C16 N6 1.343(4) . ? 
C17 N6 1.329(4) . ? 
C17 C24 1.426(4) . ? 
C17 C18 1.479(4) . ? 
C18 C19 1.388(5) . ? 
C18 C23 1.392(4) . ? 
C19 C20 1.378(5) . ? 
C19 H19 0.9300 . ? 
C20 C21 1.381(6) . ? 
C20 H20 0.9300 . ? 
C21 C22 1.351(6) . ? 
C21 H21 0.9300 . ? 
C22 C23 1.387(4) . ? 
C22 H22 0.9300 . ? 
C23 H23 0.9300 . ? 
C24 N5 1.324(3) . ? 
C24 C25 1.484(4) . ? 
C25 C26 1.383(5) . ? 
C25 C30 1.383(5) . ? 
C26 C27 1.403(6) . ? 
C26 H26 0.9300 . ? 
C27 C28 1.366(7) . ? 
C27 H27 0.9300 . ? 
C28 C29 1.366(7) . ? 
C28 H28 0.9300 . ? 
C29 C30 1.387(5) . ? 
C29 H29 0.9300 . ? 
C30 H30 0.9300 . ? 
C31 N9 1.339(4) . ? 
C31 N7 1.342(4) . ? 
C32 N8 1.315(4) . ? 
C32 C39 1.429(4) . ? 
C32 C33 1.481(4) . ? 
C33 C38 1.388(5) . ? 
C33 C34 1.391(5) . ? 
C34 C35 1.365(5) . ? 
C34 H34 0.9300 . ? 
C35 C36 1.379(6) . ? 
C35 H35 0.9300 . ? 
C36 C37 1.365(7) . ? 
C36 H36 0.9300 . ? 
C37 C38 1.396(6) . ? 
C37 H37 0.9300 . ? 
C38 H38 0.9300 . ? 
C39 N9 1.312(4) . ? 
C39 C40 1.478(4) . ? 
C40 C41 1.371(5) . ? 
C40 C45 1.373(5) . ? 
C41 C42 1.391(6) . ? 
C41 H41 0.9300 . ? 
C42 C43 1.367(7) . ? 
C42 H42 0.9300 . ? 
C43 C44 1.357(7) . ? 
C43 H43 0.9300 . ? 
C44 C45 1.356(6) . ? 
C44 H44 0.9300 . ? 
C45 H45 0.9300 . ? 
N1 N2 1.336(3) . ? 
N4 N5 1.338(3) . ? 
N7 N8 1.338(3) . ? 
  
loop_ 
 _geom_angle_atom_site_label_1 
 _geom_angle_atom_site_label_2 
 _geom_angle_atom_site_label_3 
 _geom_angle 
 _geom_angle_site_symmetry_1 
 _geom_angle_site_symmetry_3 
 _geom_angle_publ_flag 
N7 Co1 N4 91.41(10) . . ? 
N7 Co1 N1 90.95(9) . . ? 
N4 Co1 N1 91.10(9) . . ? 
N7 Co1 S5 91.68(7) . . ? 
N4 Co1 S5 91.89(7) . . ? 
N1 Co1 S5 175.97(7) . . ? 
N7 Co1 S1 93.64(7) . . ? 
N4 Co1 S1 174.59(7) . . ? 
N1 Co1 S1 90.75(7) . . ? 
S5 Co1 S1 86.04(3) . . ? 
N7 Co1 S3 174.91(7) . . ? 
N4 Co1 S3 91.40(7) . . ? 
N1 Co1 S3 93.24(7) . . ? 
S5 Co1 S3 83.99(3) . . ? 
S1 Co1 S3 83.42(4) . . ? 
S2 S1 Co1 100.49(4) . . ? 
C1 S2 S1 102.34(10) . . ? 
S4 S3 Co1 100.84(4) . . ? 
C16 S4 S3 102.71(12) . . ? 
S6 S5 Co1 101.26(4) . . ? 
C31 S6 S5 102.50(11) . . ? 
N3 C1 N1 124.5(2) . . ? 
N3 C1 S2 114.4(2) . . ? 
N1 C1 S2 121.0(2) . . ? 
N3 C2 C9 118.9(2) . . ? 
N3 C2 C3 115.9(3) . . ? 
C9 C2 C3 125.1(3) . . ? 
C4 C3 C8 118.8(3) . . ? 
C4 C3 C2 119.6(3) . . ? 
C8 C3 C2 121.3(3) . . ? 
C3 C4 C5 120.3(4) . . ? 
C3 C4 H4 119.9 . . ? 
C5 C4 H4 119.9 . . ? 
C6 C5 C4 119.7(4) . . ? 
C6 C5 H5 120.2 . . ? 
C4 C5 H5 120.2 . . ? 
C7 C6 C5 120.3(4) . . ? 
C7 C6 H6 119.8 . . ? 
C5 C6 H6 119.8 . . ? 
C6 C7 C8 120.9(4) . . ? 
C6 C7 H7 119.5 . . ? 
C8 C7 H7 119.5 . . ? 
C7 C8 C3 120.0(4) . . ? 
C7 C8 H8 120.0 . . ? 
C3 C8 H8 120.0 . . ? 
N2 C9 C2 120.2(2) . . ? 
N2 C9 C10 115.0(2) . . ? 
C2 C9 C10 124.8(2) . . ? 
C15 C10 C11 119.5(3) . . ? 
C15 C10 C9 119.6(3) . . ? 
C11 C10 C9 120.9(3) . . ? 
C12 C11 C10 120.0(4) . . ? 
C12 C11 H11 120.0 . . ? 
C10 C11 H11 120.0 . . ? 
C13 C12 C11 120.2(4) . . ? 
C13 C12 H12 119.9 . . ? 
C11 C12 H12 119.9 . . ? 
C12 C13 C14 120.8(4) . . ? 
C12 C13 H13 119.6 . . ? 
C14 C13 H13 119.6 . . ? 
C13 C14 C15 119.9(4) . . ? 
C13 C14 H14 120.1 . . ? 
C15 C14 H14 120.1 . . ? 
C10 C15 C14 119.6(4) . . ? 
C10 C15 H15 120.2 . . ? 
C14 C15 H15 120.2 . . ? 
N4 C16 N6 124.1(3) . . ? 
N4 C16 S4 121.4(2) . . ? 
N6 C16 S4 114.5(2) . . ? 
N6 C17 C24 118.9(3) . . ? 
N6 C17 C18 115.3(3) . . ? 
C24 C17 C18 125.8(3) . . ? 
C19 C18 C23 119.3(3) . . ? 
C19 C18 C17 118.5(3) . . ? 
C23 C18 C17 122.2(3) . . ? 
C20 C19 C18 120.3(4) . . ? 
C20 C19 H19 119.8 . . ? 
C18 C19 H19 119.8 . . ? 
C19 C20 C21 119.7(4) . . ? 
C19 C20 H20 120.2 . . ? 
C21 C20 H20 120.2 . . ? 
C22 C21 C20 120.5(3) . . ? 
C22 C21 H21 119.7 . . ? 
C20 C21 H21 119.7 . . ? 
C21 C22 C23 120.9(3) . . ? 
C21 C22 H22 119.6 . . ? 
C23 C22 H22 119.6 . . ? 
C22 C23 C18 119.3(3) . . ? 
C22 C23 H23 120.3 . . ? 
C18 C23 H23 120.3 . . ? 
N5 C24 C17 119.8(3) . . ? 
N5 C24 C25 114.2(3) . . ? 
C17 C24 C25 125.9(3) . . ? 
C26 C25 C30 119.6(3) . . ? 
C26 C25 C24 120.8(3) . . ? 
C30 C25 C24 119.5(3) . . ? 
C25 C26 C27 118.6(4) . . ? 
C25 C26 H26 120.7 . . ? 
C27 C26 H26 120.7 . . ? 
C28 C27 C26 121.3(4) . . ? 
C28 C27 H27 119.3 . . ? 
C26 C27 H27 119.3 . . ? 
C27 C28 C29 119.8(4) . . ? 
C27 C28 H28 120.1 . . ? 
C29 C28 H28 120.1 . . ? 
C28 C29 C30 119.9(4) . . ? 
C28 C29 H29 120.1 . . ? 
C30 C29 H29 120.1 . . ? 
C25 C30 C29 120.8(4) . . ? 
C25 C30 H30 119.6 . . ? 
C29 C30 H30 119.6 . . ? 
N9 C31 N7 123.9(3) . . ? 
N9 C31 S6 115.1(2) . . ? 
N7 C31 S6 121.0(2) . . ? 
N8 C32 C39 120.0(3) . . ? 
N8 C32 C33 114.1(3) . . ? 
C39 C32 C33 125.9(3) . . ? 
C38 C33 C34 118.9(3) . . ? 
C38 C33 C32 121.7(3) . . ? 
C34 C33 C32 119.3(3) . . ? 
C35 C34 C33 121.2(3) . . ? 
C35 C34 H34 119.4 . . ? 
C33 C34 H34 119.4 . . ? 
C34 C35 C36 119.7(4) . . ? 
C34 C35 H35 120.1 . . ? 
C36 C35 H35 120.1 . . ? 
C37 C36 C35 120.4(4) . . ? 
C37 C36 H36 119.8 . . ? 
C35 C36 H36 119.8 . . ? 
C36 C37 C38 120.4(4) . . ? 
C36 C37 H37 119.8 . . ? 
C38 C37 H37 119.8 . . ? 
C33 C38 C37 119.4(4) . . ? 
C33 C38 H38 120.3 . . ? 
C37 C38 H38 120.3 . . ? 
N9 C39 C32 119.6(3) . . ? 
N9 C39 C40 117.7(3) . . ? 
C32 C39 C40 122.7(3) . . ? 
C41 C40 C45 118.4(3) . . ? 
C41 C40 C39 122.7(3) . . ? 
C45 C40 C39 118.9(3) . . ? 
C40 C41 C42 120.3(4) . . ? 
C40 C41 H41 119.8 . . ? 
C42 C41 H41 119.8 . . ? 
C43 C42 C41 119.7(4) . . ? 
C43 C42 H42 120.2 . . ? 
C41 C42 H42 120.2 . . ? 
C44 C43 C42 119.6(4) . . ? 
C44 C43 H43 120.2 . . ? 
C42 C43 H43 120.2 . . ? 
C43 C44 C45 120.8(4) . . ? 
C43 C44 H44 119.6 . . ? 
C45 C44 H44 119.6 . . ? 
C44 C45 C40 121.0(4) . . ? 
C44 C45 H45 119.5 . . ? 
C40 C45 H45 119.5 . . ? 
N2 N1 C1 118.2(2) . . ? 
N2 N1 Co1 119.18(17) . . ? 
C1 N1 Co1 122.34(18) . . ? 
C9 N2 N1 119.7(2) . . ? 
C2 N3 C1 117.4(2) . . ? 
C16 N4 N5 118.7(2) . . ? 
C16 N4 Co1 122.85(19) . . ? 
N5 N4 Co1 118.29(18) . . ? 
C24 N5 N4 120.4(2) . . ? 
C17 N6 C16 117.9(3) . . ? 
N8 N7 C31 118.8(2) . . ? 
N8 N7 Co1 117.55(17) . . ? 
C31 N7 Co1 123.1(2) . . ? 
C32 N8 N7 120.0(2) . . ? 
C39 N9 C31 117.8(3) . . ? 
  
loop_ 
 _geom_torsion_atom_site_label_1 
 _geom_torsion_atom_site_label_2 
 _geom_torsion_atom_site_label_3 
 _geom_torsion_atom_site_label_4 
 _geom_torsion 
 _geom_torsion_site_symmetry_1 
 _geom_torsion_site_symmetry_2 
 _geom_torsion_site_symmetry_3 
 _geom_torsion_site_symmetry_4 
 _geom_torsion_publ_flag 
N7 Co1 S1 S2 -76.19(8) . . . . ? 
N1 Co1 S1 S2 14.81(8) . . . . ? 
S5 Co1 S1 S2 -167.62(5) . . . . ? 
S3 Co1 S1 S2 107.98(5) . . . . ? 
Co1 S1 S2 C1 -12.96(10) . . . . ? 
N4 Co1 S3 S4 6.31(8) . . . . ? 
N1 Co1 S3 S4 -84.87(8) . . . . ? 
S5 Co1 S3 S4 98.06(5) . . . . ? 
S1 Co1 S3 S4 -175.25(5) . . . . ? 
Co1 S3 S4 C16 -3.64(12) . . . . ? 
N7 Co1 S5 S6 2.45(8) . . . . ? 
N4 Co1 S5 S6 -89.02(8) . . . . ? 
S1 Co1 S5 S6 95.98(5) . . . . ? 
S3 Co1 S5 S6 179.76(5) . . . . ? 
Co1 S5 S6 C31 0.28(12) . . . . ? 
S1 S2 C1 N3 179.77(19) . . . . ? 
S1 S2 C1 N1 4.2(2) . . . . ? 
N3 C2 C3 C4 31.0(4) . . . . ? 
C9 C2 C3 C4 -151.9(3) . . . . ? 
N3 C2 C3 C8 -142.9(3) . . . . ? 
C9 C2 C3 C8 34.3(5) . . . . ? 
C8 C3 C4 C5 0.5(5) . . . . ? 
C2 C3 C4 C5 -173.5(3) . . . . ? 
C3 C4 C5 C6 1.0(6) . . . . ? 
C4 C5 C6 C7 -2.1(7) . . . . ? 
C5 C6 C7 C8 1.5(7) . . . . ? 
C6 C7 C8 C3 0.0(7) . . . . ? 
C4 C3 C8 C7 -1.0(5) . . . . ? 
C2 C3 C8 C7 172.9(3) . . . . ? 
N3 C2 C9 N2 9.8(4) . . . . ? 
C3 C2 C9 N2 -167.3(3) . . . . ? 
N3 C2 C9 C10 -172.5(3) . . . . ? 
C3 C2 C9 C10 10.5(5) . . . . ? 
N2 C9 C10 C15 52.4(4) . . . . ? 
C2 C9 C10 C15 -125.5(4) . . . . ? 
N2 C9 C10 C11 -127.4(3) . . . . ? 
C2 C9 C10 C11 54.7(4) . . . . ? 
C15 C10 C11 C12 1.7(5) . . . . ? 
C9 C10 C11 C12 -178.5(3) . . . . ? 
C10 C11 C12 C13 -0.1(6) . . . . ? 
C11 C12 C13 C14 -0.9(7) . . . . ? 
C12 C13 C14 C15 0.3(7) . . . . ? 
C11 C10 C15 C14 -2.3(6) . . . . ? 
C9 C10 C15 C14 177.9(3) . . . . ? 
C13 C14 C15 C10 1.3(7) . . . . ? 
S3 S4 C16 N4 -2.5(3) . . . . ? 
S3 S4 C16 N6 176.9(2) . . . . ? 
N6 C17 C18 C19 -41.3(4) . . . . ? 
C24 C17 C18 C19 138.2(4) . . . . ? 
N6 C17 C18 C23 135.8(3) . . . . ? 
C24 C17 C18 C23 -44.7(5) . . . . ? 
C23 C18 C19 C20 1.2(6) . . . . ? 
C17 C18 C19 C20 178.4(4) . . . . ? 
C18 C19 C20 C21 -1.3(7) . . . . ? 
C19 C20 C21 C22 -0.2(7) . . . . ? 
C20 C21 C22 C23 1.9(6) . . . . ? 
C21 C22 C23 C18 -2.0(5) . . . . ? 
C19 C18 C23 C22 0.5(5) . . . . ? 
C17 C18 C23 C22 -176.6(3) . . . . ? 
N6 C17 C24 N5 2.4(4) . . . . ? 
C18 C17 C24 N5 -177.1(3) . . . . ? 
N6 C17 C24 C25 -179.4(3) . . . . ? 
C18 C17 C24 C25 1.1(5) . . . . ? 
N5 C24 C25 C26 123.3(3) . . . . ? 
C17 C24 C25 C26 -55.0(5) . . . . ? 
N5 C24 C25 C30 -53.0(4) . . . . ? 
C17 C24 C25 C30 128.7(3) . . . . ? 
C30 C25 C26 C27 0.3(6) . . . . ? 
C24 C25 C26 C27 -176.0(4) . . . . ? 
C25 C26 C27 C28 -0.9(7) . . . . ? 
C26 C27 C28 C29 0.6(8) . . . . ? 
C27 C28 C29 C30 0.4(7) . . . . ? 
C26 C25 C30 C29 0.6(6) . . . . ? 
C24 C25 C30 C29 177.0(3) . . . . ? 
C28 C29 C30 C25 -1.0(7) . . . . ? 
S5 S6 C31 N9 174.8(2) . . . . ? 
S5 S6 C31 N7 -4.8(3) . . . . ? 
N8 C32 C33 C38 129.1(3) . . . . ? 
C39 C32 C33 C38 -48.4(5) . . . . ? 
N8 C32 C33 C34 -47.9(4) . . . . ? 
C39 C32 C33 C34 134.6(3) . . . . ? 
C38 C33 C34 C35 0.7(5) . . . . ? 
C32 C33 C34 C35 177.8(3) . . . . ? 
C33 C34 C35 C36 -0.4(6) . . . . ? 
C34 C35 C36 C37 0.5(7) . . . . ? 
C35 C36 C37 C38 -1.0(8) . . . . ? 
C34 C33 C38 C37 -1.1(6) . . . . ? 
C32 C33 C38 C37 -178.1(4) . . . . ? 
C36 C37 C38 C33 1.2(7) . . . . ? 
N8 C32 C39 N9 -0.1(4) . . . . ? 
C33 C32 C39 N9 177.3(3) . . . . ? 
N8 C32 C39 C40 -178.1(3) . . . . ? 
C33 C32 C39 C40 -0.8(5) . . . . ? 
N9 C39 C40 C41 135.5(4) . . . . ? 
C32 C39 C40 C41 -46.4(5) . . . . ? 
N9 C39 C40 C45 -46.4(4) . . . . ? 
C32 C39 C40 C45 131.6(3) . . . . ? 
C45 C40 C41 C42 -4.1(6) . . . . ? 
C39 C40 C41 C42 173.9(4) . . . . ? 
C40 C41 C42 C43 -0.1(7) . . . . ? 
C41 C42 C43 C44 3.8(8) . . . . ? 
C42 C43 C44 C45 -3.3(8) . . . . ? 
C43 C44 C45 C40 -1.1(7) . . . . ? 
C41 C40 C45 C44 4.7(6) . . . . ? 
C39 C40 C45 C44 -173.4(4) . . . . ? 
N3 C1 N1 N2 8.8(4) . . . . ? 
S2 C1 N1 N2 -176.03(19) . . . . ? 
N3 C1 N1 Co1 -165.4(2) . . . . ? 
S2 C1 N1 Co1 9.7(3) . . . . ? 
N7 Co1 N1 N2 -97.09(19) . . . . ? 
N4 Co1 N1 N2 -5.7(2) . . . . ? 
S1 Co1 N1 N2 169.26(18) . . . . ? 
S3 Co1 N1 N2 85.81(19) . . . . ? 
N7 Co1 N1 C1 77.1(2) . . . . ? 
N4 Co1 N1 C1 168.6(2) . . . . ? 
S1 Co1 N1 C1 -16.5(2) . . . . ? 
S3 Co1 N1 C1 -100.0(2) . . . . ? 
C2 C9 N2 N1 -3.7(4) . . . . ? 
C10 C9 N2 N1 178.3(2) . . . . ? 
C1 N1 N2 C9 -5.2(4) . . . . ? 
Co1 N1 N2 C9 169.3(2) . . . . ? 
C9 C2 N3 C1 -6.4(4) . . . . ? 
C3 C2 N3 C1 171.0(2) . . . . ? 
N1 C1 N3 C2 -2.7(4) . . . . ? 
S2 C1 N3 C2 -178.1(2) . . . . ? 
N6 C16 N4 N5 4.8(4) . . . . ? 
S4 C16 N4 N5 -175.9(2) . . . . ? 
N6 C16 N4 Co1 -170.0(2) . . . . ? 
S4 C16 N4 Co1 9.3(4) . . . . ? 
N7 Co1 N4 C16 174.4(2) . . . . ? 
N1 Co1 N4 C16 83.4(2) . . . . ? 
S5 Co1 N4 C16 -93.9(2) . . . . ? 
S3 Co1 N4 C16 -9.8(2) . . . . ? 
N7 Co1 N4 N5 -0.43(19) . . . . ? 
N1 Co1 N4 N5 -91.40(19) . . . . ? 
S5 Co1 N4 N5 91.30(18) . . . . ? 
S3 Co1 N4 N5 175.33(18) . . . . ? 
C17 C24 N5 N4 -0.6(4) . . . . ? 
C25 C24 N5 N4 -179.0(2) . . . . ? 
C16 N4 N5 C24 -2.8(4) . . . . ? 
Co1 N4 N5 C24 172.19(19) . . . . ? 
C24 C17 N6 C16 -0.7(4) . . . . ? 
C18 C17 N6 C16 178.8(3) . . . . ? 
N4 C16 N6 C17 -2.9(5) . . . . ? 
S4 C16 N6 C17 177.8(2) . . . . ? 
N9 C31 N7 N8 -0.1(4) . . . . ? 
S6 C31 N7 N8 179.5(2) . . . . ? 
N9 C31 N7 Co1 -171.4(2) . . . . ? 
S6 C31 N7 Co1 8.2(3) . . . . ? 
N4 Co1 N7 N8 -85.82(19) . . . . ? 
N1 Co1 N7 N8 5.30(19) . . . . ? 
S5 Co1 N7 N8 -177.75(18) . . . . ? 
S1 Co1 N7 N8 96.11(18) . . . . ? 
N4 Co1 N7 C31 85.6(2) . . . . ? 
N1 Co1 N7 C31 176.7(2) . . . . ? 
S5 Co1 N7 C31 -6.3(2) . . . . ? 
S1 Co1 N7 C31 -92.5(2) . . . . ? 
C39 C32 N8 N7 0.4(4) . . . . ? 
C33 C32 N8 N7 -177.3(2) . . . . ? 
C31 N7 N8 C32 -0.3(4) . . . . ? 
Co1 N7 N8 C32 171.5(2) . . . . ? 
C32 C39 N9 C31 -0.3(4) . . . . ? 
C40 C39 N9 C31 177.8(3) . . . . ? 
N7 C31 N9 C39 0.4(4) . . . . ? 
S6 C31 N9 C39 -179.2(2) . . . . ? 
  
_diffrn_measured_fraction_theta_max    0.984 
_diffrn_reflns_theta_full              70.57 
_diffrn_measured_fraction_theta_full   0.984 
_refine_diff_density_max    0.971 
_refine_diff_density_min   -0.285 
_refine_diff_density_rms    0.057 

#===END 

  
data_L2_m  
  
_audit_creation_method            SHELXL-97 
_chemical_name_systematic 
; 
 ? 
; 
_chemical_name_common             ? 
_chemical_melting_point           ? 
_chemical_formula_moiety          ? 
_chemical_formula_sum 
 'C30 H20 N6 S2' 
_chemical_formula_weight          528.64 
  
loop_ 
 _atom_type_symbol 
 _atom_type_description 
 _atom_type_scat_dispersion_real 
 _atom_type_scat_dispersion_imag 
 _atom_type_scat_source 
 'C'  'C'   0.0181   0.0091 
 'International Tables Vol C Tables 4.2.6.8 and 6.1.1.4' 
 'H'  'H'   0.0000   0.0000 
 'International Tables Vol C Tables 4.2.6.8 and 6.1.1.4' 
 'N'  'N'   0.0311   0.0180 
 'International Tables Vol C Tables 4.2.6.8 and 6.1.1.4' 
 'S'  'S'   0.3331   0.5567 
 'International Tables Vol C Tables 4.2.6.8 and 6.1.1.4' 
  
_symmetry_cell_setting            Triclinic 
_symmetry_space_group_name_H-M    P-1 
  
loop_ 
 _symmetry_equiv_pos_as_xyz 
 'x, y, z' 
 '-x, -y, -z' 
  
_cell_length_a                    5.85400(10) 
_cell_length_b                    11.5205(3) 
_cell_length_c                    19.5150(4) 
_cell_angle_alpha                 95.7120(10) 
_cell_angle_beta                  93.817(2) 
_cell_angle_gamma                 101.781(2) 
_cell_volume                      1276.88(5) 
_cell_formula_units_Z             2 
_cell_measurement_temperature     100(2) 
_cell_measurement_reflns_used     ? 
_cell_measurement_theta_min       ? 
_cell_measurement_theta_max       ? 
  
_exptl_crystal_description        prisma 
_exptl_crystal_colour             colorle 
_exptl_crystal_size_max           0.12 
_exptl_crystal_size_mid           0.04 
_exptl_crystal_size_min           0.04 
_exptl_crystal_density_meas       0 
_exptl_crystal_density_diffrn     1.375 
_exptl_crystal_density_method     'not measured' 
_exptl_crystal_F_000              548 
_exptl_absorpt_coefficient_mu     2.144 
_exptl_absorpt_correction_type    multi-scan 
_exptl_absorpt_correction_T_min   0.902 
_exptl_absorpt_correction_T_max   0.918 
_exptl_absorpt_process_details    'SADABS (Sheldrick, 2001)' 
  
_exptl_special_details 
; 
 ? 
; 
  
_diffrn_ambient_temperature       100(2) 
_diffrn_radiation_wavelength      1.54178 
_diffrn_radiation_type            CuK\a 
_diffrn_radiation_source          'fine-focus sealed tube' 
_diffrn_radiation_monochromator   graphite 
_diffrn_measurement_device_type   'CCD area detector' 
_diffrn_measurement_method        'phi and omega scans' 
_diffrn_detector_area_resol_mean  ? 
_diffrn_standards_number          ? 
_diffrn_standards_interval_count  ? 
_diffrn_standards_interval_time   ? 
_diffrn_standards_decay_%         ? 
_diffrn_reflns_number             7909 
_diffrn_reflns_av_R_equivalents   0.0359 
_diffrn_reflns_av_sigmaI/netI     0.0477 
_diffrn_reflns_limit_h_min        -5 
_diffrn_reflns_limit_h_max        6 
_diffrn_reflns_limit_k_min        -13 
_diffrn_reflns_limit_k_max        13 
_diffrn_reflns_limit_l_min        -23 
_diffrn_reflns_limit_l_max        22 
_diffrn_reflns_theta_min          2.28 
_diffrn_reflns_theta_max          66.99 
_reflns_number_total              4091 
_reflns_number_gt                 3314 
_reflns_threshold_expression      >2sigma(I) 
  
_computing_data_collection        'Bruker SMART' 
_computing_cell_refinement        'Bruker SMART' 
_computing_data_reduction         'Bruker SAINT' 
_computing_structure_solution     'SHELXS-97 (Sheldrick, 1990)' 
_computing_structure_refinement   'SHELXL-97 (Sheldrick, 1997)' 
_computing_molecular_graphics     'Bruker SHELXTL' 
_computing_publication_material   'Bruker SHELXTL' 
  
_refine_special_details 
; 
 Refinement of F^2^ against ALL reflections.  The weighted R-factor wR and 
 goodness of fit S are based on F^2^, conventional R-factors R are based 
 on F, with F set to zero for negative F^2^. The threshold expression of 
 F^2^ > 2sigma(F^2^) is used only for calculating R-factors(gt) etc. and is 
 not relevant to the choice of reflections for refinement.  R-factors based 
 on F^2^ are statistically about twice as large as those based on F, and R- 
 factors based on ALL data will be even larger. 
; 
  
_refine_ls_structure_factor_coef  Fsqd 
_refine_ls_matrix_type            full 
_refine_ls_weighting_scheme       calc 
_refine_ls_weighting_details 
 'calc w=1/[\s^2^(Fo^2^)+(0.1354P)^2^+0.3748P] where P=(Fo^2^+2Fc^2^)/3' 
_atom_sites_solution_primary      direct 
_atom_sites_solution_secondary    difmap 
_atom_sites_solution_hydrogens    geom 
_refine_ls_hydrogen_treatment     constr 
_refine_ls_extinction_method      none 
_refine_ls_extinction_coef        ? 
_refine_ls_number_reflns          4091 
_refine_ls_number_parameters      343 
_refine_ls_number_restraints      0 
_refine_ls_R_factor_all           0.0748 
_refine_ls_R_factor_gt            0.0626 
_refine_ls_wR_factor_ref          0.1840 
_refine_ls_wR_factor_gt           0.1716 
_refine_ls_goodness_of_fit_ref    1.042 
_refine_ls_restrained_S_all       1.042 
_refine_ls_shift/su_max           0.000 
_refine_ls_shift/su_mean          0.000 
  
loop_ 
 _atom_site_label 
 _atom_site_type_symbol 
 _atom_site_fract_x 
 _atom_site_fract_y 
 _atom_site_fract_z 
 _atom_site_U_iso_or_equiv 
 _atom_site_adp_type 
 _atom_site_occupancy 
 _atom_site_symmetry_multiplicity 
 _atom_site_calc_flag 
 _atom_site_refinement_flags 
 _atom_site_disorder_assembly 
 _atom_site_disorder_group 
C1 C 0.1588(6) 0.5810(3) 0.17141(17) 0.0192(7) Uani 1 1 d . . . 
C2 C 0.5611(6) 0.7240(3) 0.16290(16) 0.0193(7) Uani 1 1 d . . . 
C3 C 0.4065(6) 0.6786(3) 0.10219(17) 0.0200(7) Uani 1 1 d . . . 
C4 C 0.4617(6) 0.7017(3) 0.03089(16) 0.0208(7) Uani 1 1 d . . . 
C5 C 0.6536(6) 0.6659(3) 0.00346(17) 0.0230(7) Uani 1 1 d . . . 
H5 H 0.7518 0.6282 0.0304 0.028 Uiso 1 1 calc R . . 
C6 C 0.6994(6) 0.6861(3) -0.06411(18) 0.0265(8) Uani 1 1 d . . . 
H6 H 0.8260 0.6594 -0.0840 0.032 Uiso 1 1 calc R . . 
C7 C 0.5616(6) 0.7448(3) -0.10214(17) 0.0257(8) Uani 1 1 d . . . 
H7 H 0.5965 0.7601 -0.1477 0.031 Uiso 1 1 calc R . . 
C8 C 0.3721(6) 0.7819(3) -0.07444(17) 0.0268(8) Uani 1 1 d . . . 
H8 H 0.2787 0.8228 -0.1008 0.032 Uiso 1 1 calc R . . 
C9 C 0.3198(6) 0.7589(3) -0.00822(17) 0.0227(7) Uani 1 1 d . . . 
H9 H 0.1878 0.7821 0.0105 0.027 Uiso 1 1 calc R . . 
C10 C 0.7859(6) 0.8124(3) 0.16500(16) 0.0198(7) Uani 1 1 d . . . 
C11 C 0.9681(6) 0.8104(3) 0.21490(17) 0.0218(7) Uani 1 1 d . . . 
H11 H 0.9461 0.7528 0.2468 0.026 Uiso 1 1 calc R . . 
C12 C 1.1804(6) 0.8917(3) 0.21824(18) 0.0248(7) Uani 1 1 d . . . 
H12 H 1.3022 0.8901 0.2526 0.030 Uiso 1 1 calc R . . 
C13 C 1.2143(6) 0.9754(3) 0.17129(18) 0.0259(7) Uani 1 1 d . . . 
H13 H 1.3615 1.0291 0.1724 0.031 Uiso 1 1 calc R . . 
C14 C 1.0330(6) 0.9805(3) 0.12278(19) 0.0278(8) Uani 1 1 d . . . 
H14 H 1.0545 1.0394 0.0917 0.033 Uiso 1 1 calc R . . 
C15 C 0.8202(6) 0.8995(3) 0.11966(17) 0.0245(7) Uani 1 1 d . . . 
H15 H 0.6968 0.9034 0.0864 0.029 Uiso 1 1 calc R . . 
C16 C 0.0463(6) 0.3830(3) 0.29587(16) 0.0199(7) Uani 1 1 d . . . 
C17 C 0.2275(6) 0.3095(3) 0.38247(17) 0.0209(7) Uani 1 1 d . . . 
C18 C 0.3241(6) 0.2434(3) 0.33087(16) 0.0200(7) Uani 1 1 d . . . 
C19 C 0.4688(6) 0.1541(3) 0.34306(17) 0.0224(7) Uani 1 1 d . . . 
C20 C 0.4269(6) 0.0780(3) 0.39461(18) 0.0275(8) Uani 1 1 d . . . 
H20 H 0.3099 0.0860 0.4252 0.033 Uiso 1 1 calc R . . 
C21 C 0.5575(7) -0.0093(3) 0.40091(19) 0.0330(9) Uani 1 1 d . . . 
H21 H 0.5276 -0.0617 0.4354 0.040 Uiso 1 1 calc R . . 
C22 C 0.7307(7) -0.0204(3) 0.3572(2) 0.0323(9) Uani 1 1 d . . . 
H22 H 0.8210 -0.0792 0.3624 0.039 Uiso 1 1 calc R . . 
C23 C 0.7726(6) 0.0544(3) 0.30583(19) 0.0283(8) Uani 1 1 d . . . 
H23 H 0.8902 0.0460 0.2755 0.034 Uiso 1 1 calc R . . 
C24 C 0.6431(6) 0.1411(3) 0.29869(18) 0.0250(7) Uani 1 1 d . . . 
H24 H 0.6725 0.1922 0.2635 0.030 Uiso 1 1 calc R . . 
C25 C 0.2916(6) 0.3142(3) 0.45782(17) 0.0246(7) Uani 1 1 d . . . 
C26 C 0.1192(7) 0.2871(3) 0.50244(18) 0.0327(9) Uani 1 1 d . . . 
H26 H -0.0404 0.2607 0.4850 0.039 Uiso 1 1 calc R . . 
C27 C 0.1829(8) 0.2990(4) 0.5733(2) 0.0424(10) Uani 1 1 d . . . 
H27 H 0.0653 0.2815 0.6043 0.051 Uiso 1 1 calc R . . 
C28 C 0.4138(8) 0.3359(4) 0.5989(2) 0.0425(11) Uani 1 1 d . . . 
H28 H 0.4550 0.3421 0.6473 0.051 Uiso 1 1 calc R . . 
C29 C 0.5855(7) 0.3637(3) 0.5547(2) 0.0368(10) Uani 1 1 d . . . 
H29 H 0.7444 0.3914 0.5726 0.044 Uiso 1 1 calc R . . 
C30 C 0.5254(7) 0.3511(3) 0.48334(18) 0.0287(8) Uani 1 1 d . . . 
H30 H 0.6438 0.3676 0.4525 0.034 Uiso 1 1 calc R . . 
N1 N 0.3055(5) 0.6090(2) 0.22820(14) 0.0223(6) Uani 1 1 d . . . 
N2 N 0.5090(5) 0.6855(2) 0.22323(14) 0.0216(6) Uani 1 1 d . . . 
N3 N 0.1989(5) 0.6097(2) 0.10805(14) 0.0207(6) Uani 1 1 d . . . 
N4 N 0.1455(5) 0.3313(2) 0.24578(14) 0.0235(6) Uani 1 1 d . . . 
N5 N 0.2808(5) 0.2570(2) 0.26394(14) 0.0232(6) Uani 1 1 d . . . 
N6 N 0.0787(5) 0.3765(2) 0.36391(14) 0.0218(6) Uani 1 1 d . . . 
S1 S -0.12183(13) 0.48727(7) 0.17305(4) 0.0211(2) Uani 1 1 d . . . 
S2 S -0.14738(14) 0.47810(7) 0.27587(4) 0.0221(2) Uani 1 1 d . . . 
  
loop_ 
 _atom_site_aniso_label 
 _atom_site_aniso_U_11 
 _atom_site_aniso_U_22 
 _atom_site_aniso_U_33 
 _atom_site_aniso_U_23 
 _atom_site_aniso_U_13 
 _atom_site_aniso_U_12 
C1 0.0207(17) 0.0166(15) 0.0207(16) -0.0012(12) 0.0011(12) 0.0069(12) 
C2 0.0220(17) 0.0191(16) 0.0181(16) -0.0008(13) 0.0007(12) 0.0092(13) 
C3 0.0233(18) 0.0166(16) 0.0204(17) -0.0030(13) 0.0006(13) 0.0078(13) 
C4 0.0232(17) 0.0181(16) 0.0183(16) -0.0027(13) -0.0008(12) 0.0011(12) 
C5 0.0247(18) 0.0225(17) 0.0213(17) -0.0026(14) 0.0021(13) 0.0058(13) 
C6 0.0266(19) 0.0277(18) 0.0228(18) -0.0060(14) 0.0057(14) 0.0032(14) 
C7 0.034(2) 0.0249(18) 0.0149(16) -0.0019(13) 0.0020(13) 0.0000(14) 
C8 0.033(2) 0.0276(18) 0.0190(17) 0.0022(14) -0.0033(14) 0.0074(14) 
C9 0.0232(18) 0.0233(17) 0.0203(17) -0.0026(13) -0.0005(13) 0.0051(13) 
C10 0.0234(17) 0.0184(16) 0.0174(16) -0.0037(13) 0.0007(12) 0.0069(13) 
C11 0.0253(18) 0.0211(17) 0.0190(16) -0.0025(13) 0.0011(13) 0.0077(13) 
C12 0.0245(18) 0.0251(17) 0.0232(17) -0.0090(14) -0.0024(13) 0.0090(13) 
C13 0.0231(18) 0.0232(17) 0.0296(19) -0.0046(14) 0.0039(14) 0.0038(13) 
C14 0.032(2) 0.0235(18) 0.0266(19) 0.0006(14) 0.0017(14) 0.0034(14) 
C15 0.0276(19) 0.0235(17) 0.0208(17) -0.0022(14) -0.0015(13) 0.0055(14) 
C16 0.0209(17) 0.0157(15) 0.0222(17) 0.0022(13) 0.0009(12) 0.0022(12) 
C17 0.0204(17) 0.0182(16) 0.0232(17) -0.0002(13) 0.0021(13) 0.0035(12) 
C18 0.0214(17) 0.0190(16) 0.0180(16) -0.0020(13) 0.0014(12) 0.0026(12) 
C19 0.0228(18) 0.0213(17) 0.0214(17) -0.0045(13) -0.0043(13) 0.0058(13) 
C20 0.035(2) 0.0291(19) 0.0198(17) -0.0012(14) 0.0016(14) 0.0129(15) 
C21 0.048(2) 0.0284(19) 0.026(2) 0.0017(15) -0.0009(16) 0.0182(17) 
C22 0.034(2) 0.0287(19) 0.035(2) -0.0073(16) -0.0051(15) 0.0161(16) 
C23 0.0233(19) 0.0262(18) 0.0314(19) -0.0136(15) -0.0007(14) 0.0054(14) 
C24 0.0266(19) 0.0223(17) 0.0232(18) -0.0065(14) -0.0007(13) 0.0038(14) 
C25 0.034(2) 0.0225(17) 0.0195(17) -0.0025(13) 0.0005(14) 0.0146(14) 
C26 0.041(2) 0.040(2) 0.0220(19) 0.0012(16) 0.0045(15) 0.0202(17) 
C27 0.055(3) 0.062(3) 0.021(2) 0.0051(18) 0.0085(17) 0.036(2) 
C28 0.068(3) 0.049(2) 0.0192(19) -0.0068(17) -0.0041(18) 0.040(2) 
C29 0.050(3) 0.032(2) 0.028(2) -0.0134(16) -0.0143(17) 0.0230(18) 
C30 0.035(2) 0.0265(18) 0.0237(19) -0.0045(15) -0.0028(14) 0.0107(15) 
N1 0.0210(15) 0.0236(15) 0.0222(15) 0.0006(12) 0.0004(11) 0.0060(11) 
N2 0.0214(15) 0.0225(14) 0.0209(14) -0.0001(11) -0.0006(11) 0.0067(11) 
N3 0.0253(15) 0.0195(14) 0.0178(14) 0.0002(11) 0.0005(11) 0.0071(11) 
N4 0.0292(16) 0.0238(15) 0.0190(14) 0.0002(11) 0.0035(11) 0.0096(12) 
N5 0.0293(16) 0.0211(14) 0.0204(15) 0.0008(11) 0.0037(11) 0.0083(11) 
N6 0.0239(15) 0.0209(14) 0.0194(14) -0.0032(11) 0.0017(11) 0.0046(11) 
S1 0.0217(5) 0.0208(4) 0.0199(4) 0.0008(3) -0.0010(3) 0.0040(3) 
S2 0.0244(5) 0.0224(4) 0.0208(4) 0.0011(3) 0.0034(3) 0.0083(3) 
  
_geom_special_details 
; 
 All esds (except the esd in the dihedral angle between two l.s. planes) 
 are estimated using the full covariance matrix.  The cell esds are taken 
 into account individually in the estimation of esds in distances, angles 
 and torsion angles; correlations between esds in cell parameters are only 
 used when they are defined by crystal symmetry.  An approximate (isotropic) 
 treatment of cell esds is used for estimating esds involving l.s. planes. 
; 
  
loop_ 
 _geom_bond_atom_site_label_1 
 _geom_bond_atom_site_label_2 
 _geom_bond_distance 
 _geom_bond_site_symmetry_2 
 _geom_bond_publ_flag 
C1 N1 1.326(4) . ? 
C1 N3 1.335(4) . ? 
C1 S1 1.776(3) . ? 
C2 N2 1.331(4) . ? 
C2 C3 1.427(4) . ? 
C2 C10 1.486(4) . ? 
C3 N3 1.328(4) . ? 
C3 C4 1.487(4) . ? 
C4 C5 1.394(5) . ? 
C4 C9 1.395(5) . ? 
C5 C6 1.396(5) . ? 
C5 H5 0.9500 . ? 
C6 C7 1.379(5) . ? 
C6 H6 0.9500 . ? 
C7 C8 1.390(5) . ? 
C7 H7 0.9500 . ? 
C8 C9 1.386(5) . ? 
C8 H8 0.9500 . ? 
C9 H9 0.9500 . ? 
C10 C15 1.395(5) . ? 
C10 C11 1.401(5) . ? 
C11 C12 1.388(5) . ? 
C11 H11 0.9500 . ? 
C12 C13 1.390(5) . ? 
C12 H12 0.9500 . ? 
C13 C14 1.389(5) . ? 
C13 H13 0.9500 . ? 
C14 C15 1.389(5) . ? 
C14 H14 0.9500 . ? 
C15 H15 0.9500 . ? 
C16 N4 1.322(4) . ? 
C16 N6 1.340(4) . ? 
C16 S2 1.781(3) . ? 
C17 N6 1.331(4) . ? 
C17 C18 1.419(5) . ? 
C17 C25 1.486(5) . ? 
C18 N5 1.345(4) . ? 
C18 C19 1.487(4) . ? 
C19 C20 1.400(5) . ? 
C19 C24 1.403(5) . ? 
C20 C21 1.392(5) . ? 
C20 H20 0.9500 . ? 
C21 C22 1.385(5) . ? 
C21 H21 0.9500 . ? 
C22 C23 1.387(5) . ? 
C22 H22 0.9500 . ? 
C23 C24 1.384(5) . ? 
C23 H23 0.9500 . ? 
C24 H24 0.9500 . ? 
C25 C26 1.385(5) . ? 
C25 C30 1.390(5) . ? 
C26 C27 1.394(5) . ? 
C26 H26 0.9500 . ? 
C27 C28 1.375(6) . ? 
C27 H27 0.9500 . ? 
C28 C29 1.378(6) . ? 
C28 H28 0.9500 . ? 
C29 C30 1.399(5) . ? 
C29 H29 0.9500 . ? 
C30 H30 0.9500 . ? 
N1 N2 1.345(4) . ? 
N4 N5 1.336(4) . ? 
S1 S2 2.0335(11) . ? 
  
loop_ 
 _geom_angle_atom_site_label_1 
 _geom_angle_atom_site_label_2 
 _geom_angle_atom_site_label_3 
 _geom_angle 
 _geom_angle_site_symmetry_1 
 _geom_angle_site_symmetry_3 
 _geom_angle_publ_flag 
N1 C1 N3 127.5(3) . . ? 
N1 C1 S1 120.3(2) . . ? 
N3 C1 S1 112.0(2) . . ? 
N2 C2 C3 119.8(3) . . ? 
N2 C2 C10 115.2(3) . . ? 
C3 C2 C10 124.9(3) . . ? 
N3 C3 C2 119.3(3) . . ? 
N3 C3 C4 116.3(3) . . ? 
C2 C3 C4 124.5(3) . . ? 
C5 C4 C9 120.5(3) . . ? 
C5 C4 C3 120.0(3) . . ? 
C9 C4 C3 119.5(3) . . ? 
C4 C5 C6 119.1(3) . . ? 
C4 C5 H5 120.5 . . ? 
C6 C5 H5 120.5 . . ? 
C7 C6 C5 120.3(3) . . ? 
C7 C6 H6 119.9 . . ? 
C5 C6 H6 119.9 . . ? 
C6 C7 C8 120.6(3) . . ? 
C6 C7 H7 119.7 . . ? 
C8 C7 H7 119.7 . . ? 
C9 C8 C7 119.8(3) . . ? 
C9 C8 H8 120.1 . . ? 
C7 C8 H8 120.1 . . ? 
C8 C9 C4 119.7(3) . . ? 
C8 C9 H9 120.2 . . ? 
C4 C9 H9 120.2 . . ? 
C15 C10 C11 118.7(3) . . ? 
C15 C10 C2 122.1(3) . . ? 
C11 C10 C2 119.2(3) . . ? 
C12 C11 C10 120.7(3) . . ? 
C12 C11 H11 119.6 . . ? 
C10 C11 H11 119.6 . . ? 
C11 C12 C13 119.9(3) . . ? 
C11 C12 H12 120.1 . . ? 
C13 C12 H12 120.1 . . ? 
C14 C13 C12 119.9(3) . . ? 
C14 C13 H13 120.0 . . ? 
C12 C13 H13 120.0 . . ? 
C15 C14 C13 120.1(3) . . ? 
C15 C14 H14 119.9 . . ? 
C13 C14 H14 119.9 . . ? 
C14 C15 C10 120.6(3) . . ? 
C14 C15 H15 119.7 . . ? 
C10 C15 H15 119.7 . . ? 
N4 C16 N6 127.5(3) . . ? 
N4 C16 S2 119.9(2) . . ? 
N6 C16 S2 112.6(2) . . ? 
N6 C17 C18 119.7(3) . . ? 
N6 C17 C25 116.5(3) . . ? 
C18 C17 C25 123.7(3) . . ? 
N5 C18 C17 119.6(3) . . ? 
N5 C18 C19 114.5(3) . . ? 
C17 C18 C19 125.9(3) . . ? 
C20 C19 C24 119.2(3) . . ? 
C20 C19 C18 122.0(3) . . ? 
C24 C19 C18 118.6(3) . . ? 
C21 C20 C19 119.7(3) . . ? 
C21 C20 H20 120.1 . . ? 
C19 C20 H20 120.1 . . ? 
C22 C21 C20 120.5(4) . . ? 
C22 C21 H21 119.8 . . ? 
C20 C21 H21 119.8 . . ? 
C21 C22 C23 120.1(3) . . ? 
C21 C22 H22 119.9 . . ? 
C23 C22 H22 119.9 . . ? 
C24 C23 C22 120.1(3) . . ? 
C24 C23 H23 120.0 . . ? 
C22 C23 H23 120.0 . . ? 
C23 C24 C19 120.4(3) . . ? 
C23 C24 H24 119.8 . . ? 
C19 C24 H24 119.8 . . ? 
C26 C25 C30 120.4(3) . . ? 
C26 C25 C17 120.3(3) . . ? 
C30 C25 C17 119.3(3) . . ? 
C25 C26 C27 119.1(4) . . ? 
C25 C26 H26 120.4 . . ? 
C27 C26 H26 120.4 . . ? 
C28 C27 C26 120.8(4) . . ? 
C28 C27 H27 119.6 . . ? 
C26 C27 H27 119.6 . . ? 
C27 C28 C29 120.2(4) . . ? 
C27 C28 H28 119.9 . . ? 
C29 C28 H28 119.9 . . ? 
C28 C29 C30 119.9(4) . . ? 
C28 C29 H29 120.1 . . ? 
C30 C29 H29 120.1 . . ? 
C25 C30 C29 119.6(4) . . ? 
C25 C30 H30 120.2 . . ? 
C29 C30 H30 120.2 . . ? 
C1 N1 N2 116.3(3) . . ? 
C2 N2 N1 120.5(3) . . ? 
C3 N3 C1 115.9(3) . . ? 
C16 N4 N5 116.8(3) . . ? 
N4 N5 C18 120.4(3) . . ? 
C17 N6 C16 115.6(3) . . ? 
C1 S1 S2 102.66(11) . . ? 
C16 S2 S1 102.69(11) . . ? 
  
loop_ 
 _geom_torsion_atom_site_label_1 
 _geom_torsion_atom_site_label_2 
 _geom_torsion_atom_site_label_3 
 _geom_torsion_atom_site_label_4 
 _geom_torsion 
 _geom_torsion_site_symmetry_1 
 _geom_torsion_site_symmetry_2 
 _geom_torsion_site_symmetry_3 
 _geom_torsion_site_symmetry_4 
 _geom_torsion_publ_flag 
N2 C2 C3 N3 8.2(4) . . . . ? 
C10 C2 C3 N3 -172.8(3) . . . . ? 
N2 C2 C3 C4 -171.0(3) . . . . ? 
C10 C2 C3 C4 8.0(5) . . . . ? 
N3 C3 C4 C5 -119.1(3) . . . . ? 
C2 C3 C4 C5 60.2(4) . . . . ? 
N3 C3 C4 C9 60.7(4) . . . . ? 
C2 C3 C4 C9 -120.1(3) . . . . ? 
C9 C4 C5 C6 -1.1(5) . . . . ? 
C3 C4 C5 C6 178.6(3) . . . . ? 
C4 C5 C6 C7 2.4(5) . . . . ? 
C5 C6 C7 C8 -1.6(5) . . . . ? 
C6 C7 C8 C9 -0.5(5) . . . . ? 
C7 C8 C9 C4 1.8(5) . . . . ? 
C5 C4 C9 C8 -1.0(5) . . . . ? 
C3 C4 C9 C8 179.3(3) . . . . ? 
N2 C2 C10 C15 -150.3(3) . . . . ? 
C3 C2 C10 C15 30.7(5) . . . . ? 
N2 C2 C10 C11 28.3(4) . . . . ? 
C3 C2 C10 C11 -150.7(3) . . . . ? 
C15 C10 C11 C12 -1.4(5) . . . . ? 
C2 C10 C11 C12 179.9(3) . . . . ? 
C10 C11 C12 C13 -0.6(5) . . . . ? 
C11 C12 C13 C14 2.4(5) . . . . ? 
C12 C13 C14 C15 -2.1(5) . . . . ? 
C13 C14 C15 C10 0.0(5) . . . . ? 
C11 C10 C15 C14 1.7(5) . . . . ? 
C2 C10 C15 C14 -179.7(3) . . . . ? 
N6 C17 C18 N5 5.8(5) . . . . ? 
C25 C17 C18 N5 -170.9(3) . . . . ? 
N6 C17 C18 C19 -172.2(3) . . . . ? 
C25 C17 C18 C19 11.0(5) . . . . ? 
N5 C18 C19 C20 -142.2(3) . . . . ? 
C17 C18 C19 C20 36.0(5) . . . . ? 
N5 C18 C19 C24 33.9(4) . . . . ? 
C17 C18 C19 C24 -148.0(3) . . . . ? 
C24 C19 C20 C21 -0.3(5) . . . . ? 
C18 C19 C20 C21 175.8(3) . . . . ? 
C19 C20 C21 C22 0.9(6) . . . . ? 
C20 C21 C22 C23 -1.2(6) . . . . ? 
C21 C22 C23 C24 0.7(5) . . . . ? 
C22 C23 C24 C19 -0.1(5) . . . . ? 
C20 C19 C24 C23 -0.1(5) . . . . ? 
C18 C19 C24 C23 -176.3(3) . . . . ? 
N6 C17 C25 C26 56.3(4) . . . . ? 
C18 C17 C25 C26 -126.8(4) . . . . ? 
N6 C17 C25 C30 -120.9(3) . . . . ? 
C18 C17 C25 C30 55.9(5) . . . . ? 
C30 C25 C26 C27 1.0(5) . . . . ? 
C17 C25 C26 C27 -176.2(3) . . . . ? 
C25 C26 C27 C28 -0.7(6) . . . . ? 
C26 C27 C28 C29 1.2(6) . . . . ? 
C27 C28 C29 C30 -1.9(6) . . . . ? 
C26 C25 C30 C29 -1.6(5) . . . . ? 
C17 C25 C30 C29 175.6(3) . . . . ? 
C28 C29 C30 C25 2.1(5) . . . . ? 
N3 C1 N1 N2 7.7(5) . . . . ? 
S1 C1 N1 N2 -176.5(2) . . . . ? 
C3 C2 N2 N1 -3.6(4) . . . . ? 
C10 C2 N2 N1 177.3(3) . . . . ? 
C1 N1 N2 C2 -3.8(4) . . . . ? 
C2 C3 N3 C1 -4.8(4) . . . . ? 
C4 C3 N3 C1 174.5(3) . . . . ? 
N1 C1 N3 C3 -3.2(5) . . . . ? 
S1 C1 N3 C3 -179.2(2) . . . . ? 
N6 C16 N4 N5 5.3(5) . . . . ? 
S2 C16 N4 N5 -177.2(2) . . . . ? 
C16 N4 N5 C18 -4.4(5) . . . . ? 
C17 C18 N5 N4 -0.8(5) . . . . ? 
C19 C18 N5 N4 177.5(3) . . . . ? 
C18 C17 N6 C16 -5.1(4) . . . . ? 
C25 C17 N6 C16 171.8(3) . . . . ? 
N4 C16 N6 C17 -0.4(5) . . . . ? 
S2 C16 N6 C17 -178.1(2) . . . . ? 
N1 C1 S1 S2 10.8(3) . . . . ? 
N3 C1 S1 S2 -172.8(2) . . . . ? 
N4 C16 S2 S1 -5.7(3) . . . . ? 
N6 C16 S2 S1 172.2(2) . . . . ? 
C1 S1 S2 C16 -73.58(15) . . . . ? 
  
_diffrn_measured_fraction_theta_max    0.902 
_diffrn_reflns_theta_full              66.99 
_diffrn_measured_fraction_theta_full   0.902 
_refine_diff_density_max    1.067 
_refine_diff_density_min   -0.327 
_refine_diff_density_rms    0.119 

#===END 
